# Supplementary material for: GenusSpatholobus: a comprehensive review on ethnopharmacology, phytochemistry, pharmacology, and toxicology
Source: Royal Society of Chemistry journal article supplement (doi:10.1039/d2fo00895e), 2022-01-01
Supplement: d2fo00895e1.pdf [file d2fo00895e1.pdf]

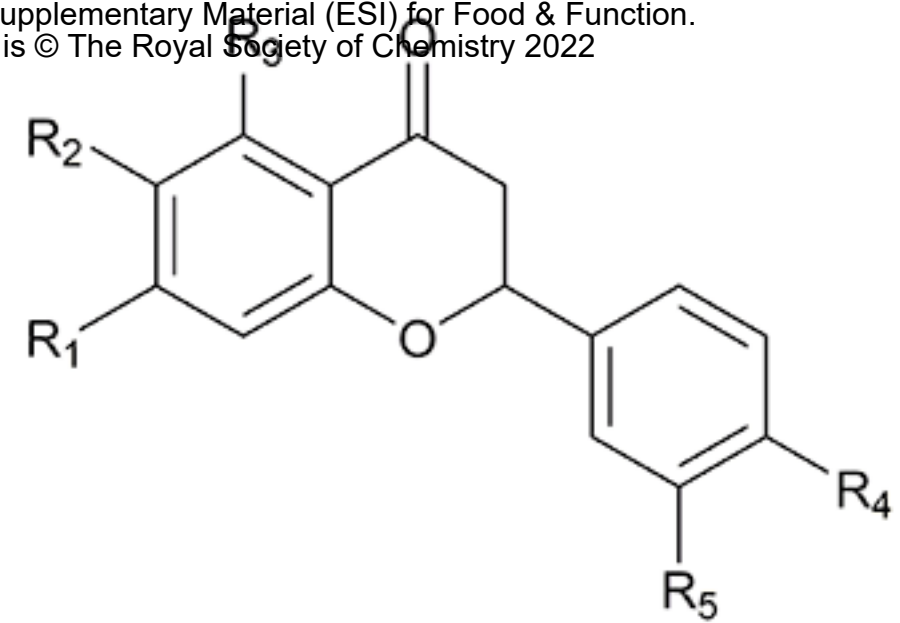

| No. | R1 | R2  | R3 | R4  | R5 |
|-----|----|-----|----|-----|----|
| 1   | OH | H   | OH | OH  | H  |
| 2   | OH | H   | H  | OH  | OH |
| 3   | OH | H   | H  | OH  | OH |
| 4   | OH | OMe | OH | OH  | OH |
| 5   | OH | OH  | H  | OH  | OH |
| 6   | OH | H   | OH | OMe | OH |
| 7   | OH | H   | H  | H   | H  |
| 8   | OH | OMe | H  | OH  | OH |
| 9   | OH | H   | H  | OH  | H  |
| 10  | OH | OMe | H  | H   | H  |

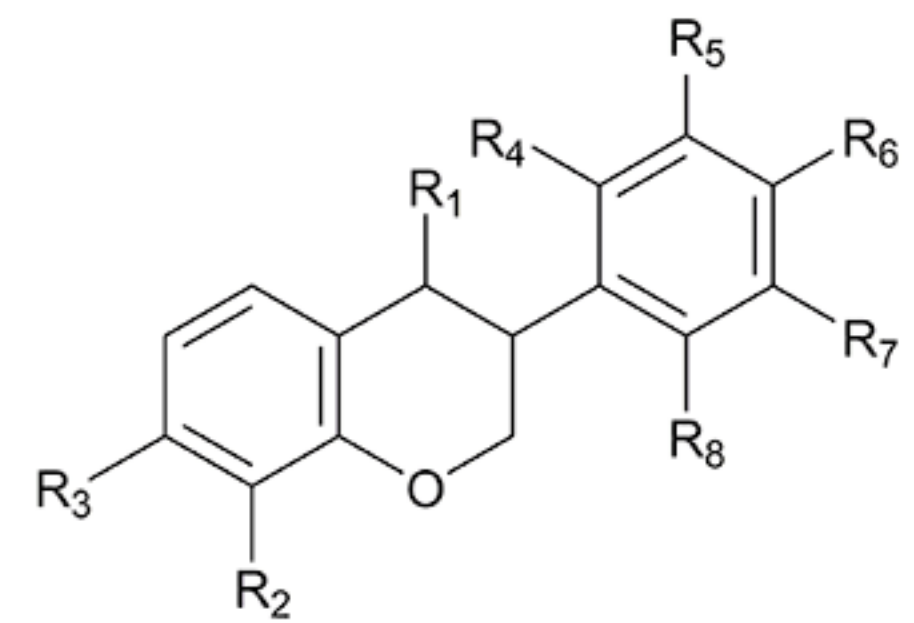

| No. | R1 | R2  | R3  | R4  | R5      | R6  | R7  | R8   |
|-----|----|-----|-----|-----|---------|-----|-----|------|
| 11  | H  | OMe | OH  | H   | H       | OH  | OMe | OH   |
| 12  | H  | OMe | OH  | H   | H       | OH  | OMe | OMe  |
| 13  | H  | H   | OH  | OMe | H       | OMe | H   | H    |
| 14  | H  | H   | OH  | H   | H       | OMe | H   | OGlc |
| 15  | OH | H   | OH  | H   | H       | OMe | H   | OH   |
| 16  | OH | OMe | H   | H   | -OCH2O- | H   | OH  |      |
| 17  | OH | H   | H   | H   | -OCH2O- | H   | OH  |      |
| 18  | H  | H   | OH  | OH  | H       | OMe | H   | H    |
| 19  | H  | H   | OMe | OH  | H       | OMe | H   | H    |
| 20  | H  | OMe | OH  | H   | H       | OMe | OMe | OH   |
| 21  | H  | H   | OH  | OH  | H       | OH  | H   | H    |
| 23  | H  | H   | OH  | O   | OMe     | OMe | O   | H    |

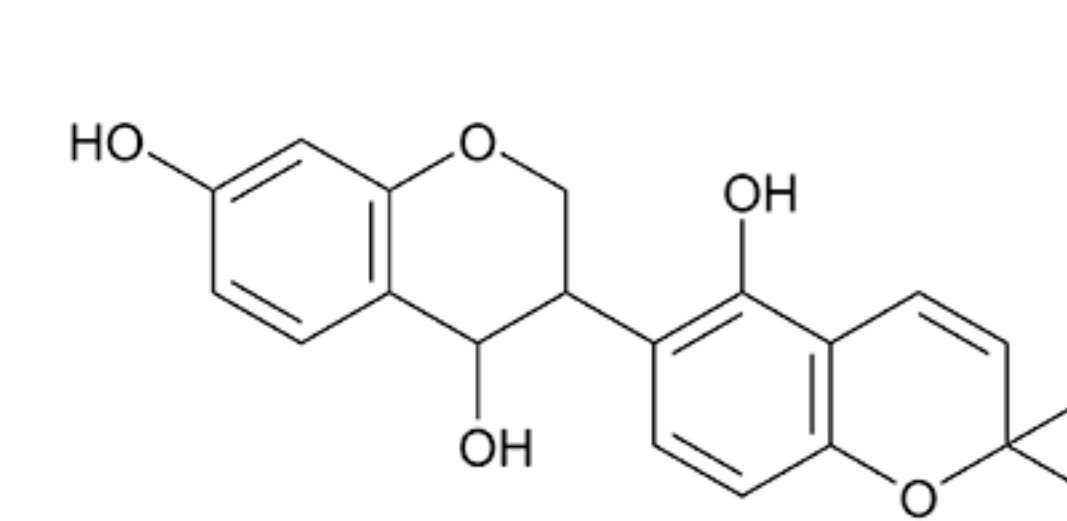

22

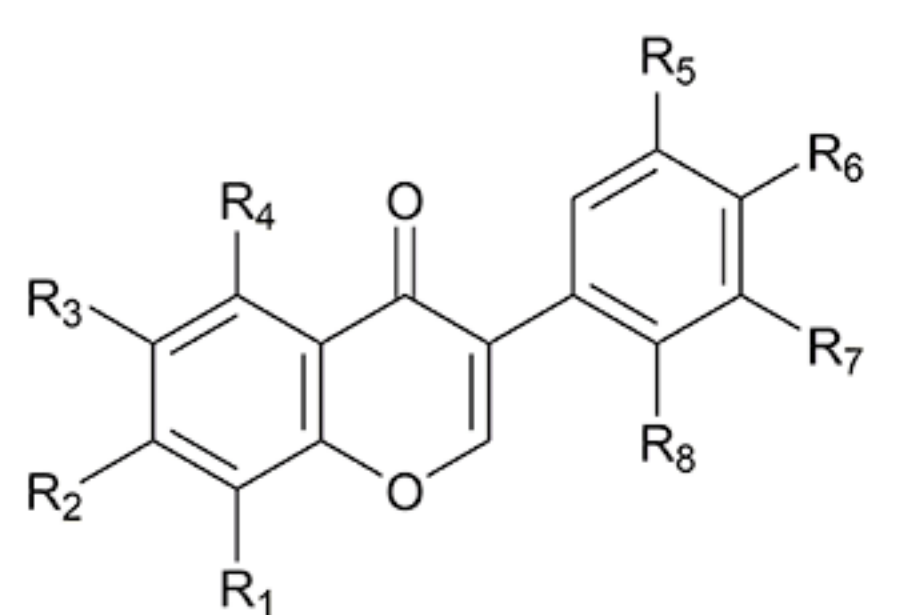

| No. | R1  | R2     | R3  | R4 | R5 | R6      | R7  | R8 |
|-----|-----|--------|-----|----|----|---------|-----|----|
| 24  | H   | OH     | H   | H  | H  | OMe     | OH  | H  |
| 25  | H   | OH     | OMe | H  | H  | OMe     | OH  | H  |
| 26  | H   | OH     | H   | H  | H  | OH      | OMe | H  |
| 27  | H   | OH     | H   | H  | H  | OH      | H   | H  |
| 28  | H   | OH     | H   | OH | H  | OH      | H   | H  |
| 29  | H   | OMe    | H   | OH | H  | OH      | H   | H  |
| 30  | OMe | OH     | H   | H  | H  | OH      | H   | H  |
| 31  | H   | OH     | H   | H  | H  | OMe     | H   | H  |
| 32  | H   | OH     | H   | OH | H  | OMe     | H   | H  |
| 33  | H   | OH     | OMe | H  | H  | OMe     | H   | H  |
| 34  | H   | OMe    | H   | OH | H  | OH      | H   | OH |
| 35  | OMe | OH     | H   | H  | H  | OMe     | H   | H  |
| 36  | H   | OH     | H   | OH | H  | OH      | H   | OH |
| 37  | OMe | OH     | H   | H  | H  | OMe     | OH  | H  |
| 38  | H   | OH     | H   | H  | OH | OH      | H   | OH |
| 39  | H   | OMe    | H   | H  | H  | OMe     | H   | H  |
| 40  | H   | OGlc   | H   | OH | H  | OH      | H   | H  |
| 41  | H   | OGlc   | H   | H  | H  | OH      | H   | H  |
| 42  | H   | OGlc   | H   | H  | H  | OMe     | H   | H  |
| 43  | H   | ODIGlc | H   | H  | H  | OMe     | H   | H  |
| 44  | OMe | OGlc   | H   | H  | H  | OMe     | H   | H  |
| 45  | H   | ORut   | H   | OH | H  | OH      | H   | H  |
| 46  | H   | OH     | H   | H  | H  | -OCH2O- | H   | H  |

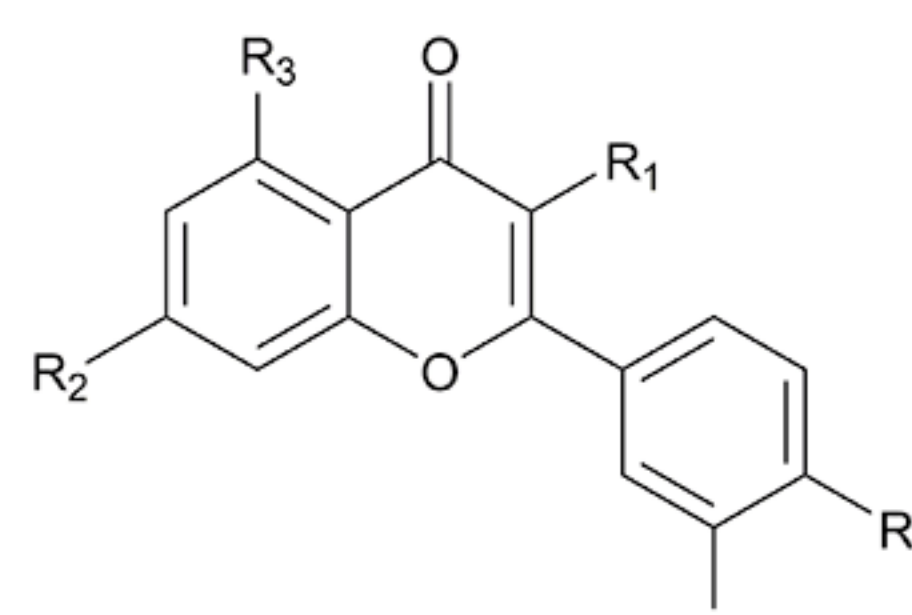

| No. | R1   | R2 | R3 | R4 | R5 |
|-----|------|----|----|----|----|
| 47  | OH   | OH | OH | OH | H  |
| 48  | ORut | OH | OH | OH | OH |

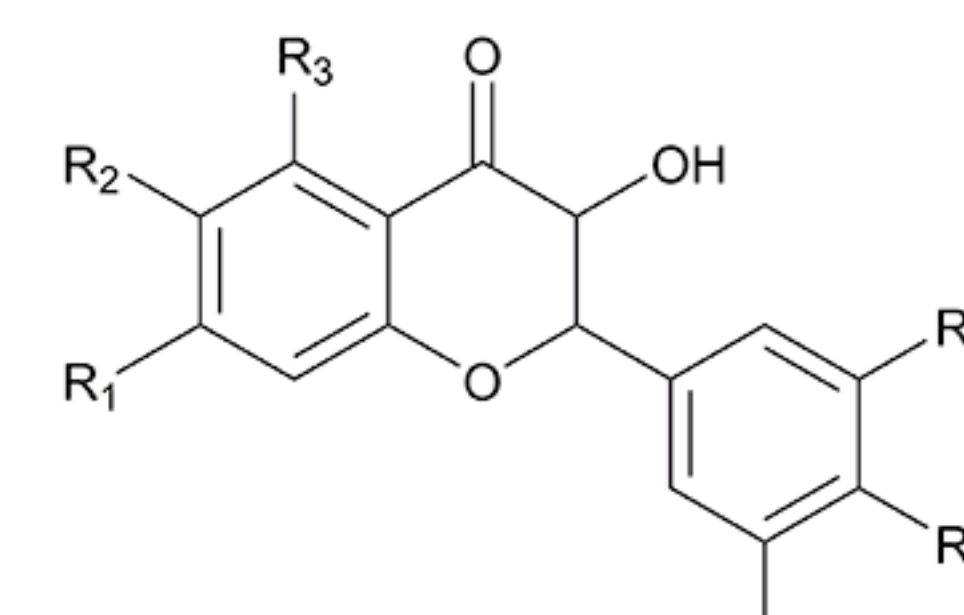

| No. | R1  | R2 | R3 | R4 | R5 | R6 |
|-----|-----|----|----|----|----|----|
| 56  | OH  | H  | OH | H  | OH | OH |
| 57  | OH  | H  | OH | OH | H  | OH |
| 58  | OH  | H  | OH | H  | OH | H  |
| 59  | OMe | OH | H  | H  | H  | H  |
| 60  | OH  | H  | H  | H  | H  | H  |

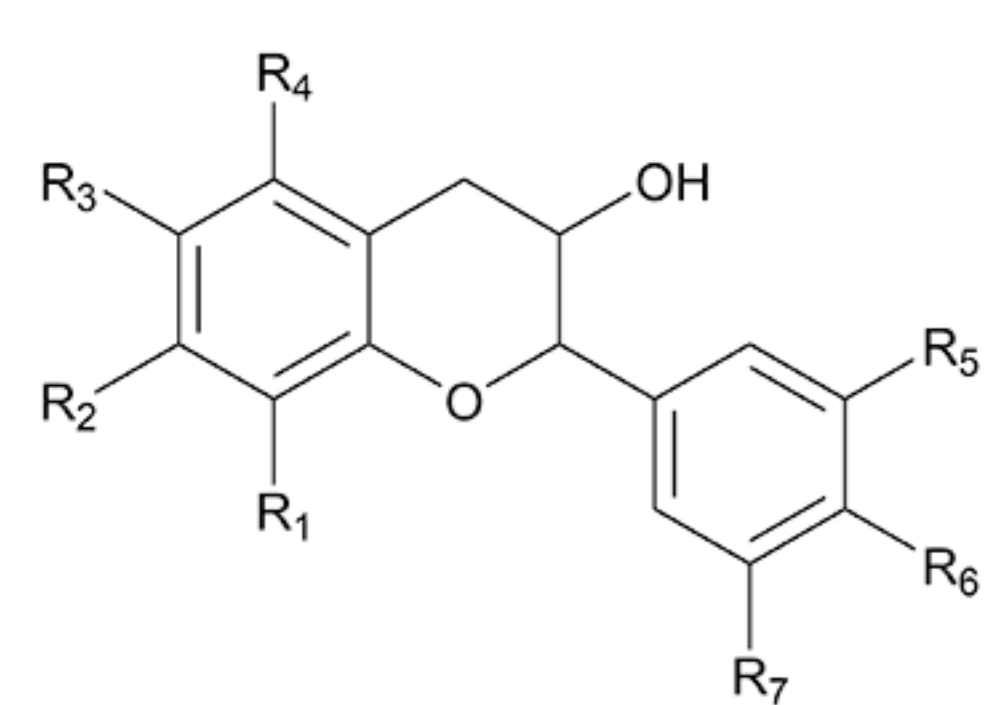

| No. | R1 | R2 | R3 | R4 | R5 | R6 | R7 |
|-----|----|----|----|----|----|----|----|
| 49  | H  | OH | H  | OH | OH | OH | OH |
| 50  | H  | OH | H  | OH | H  | OH | OH |
| 51  | OH | OH | OH | OH | H  | OH | OH |
| 52  | H  | OH | H  | OH | H  | OH | H  |
| 53  | H  | OH | H  | OH | OH | OH | OH |
| 54  | H  | OH | H  | OH | H  | OH | OH |
| 55  | H  | OH | H  | OH | H  | OH | H  |

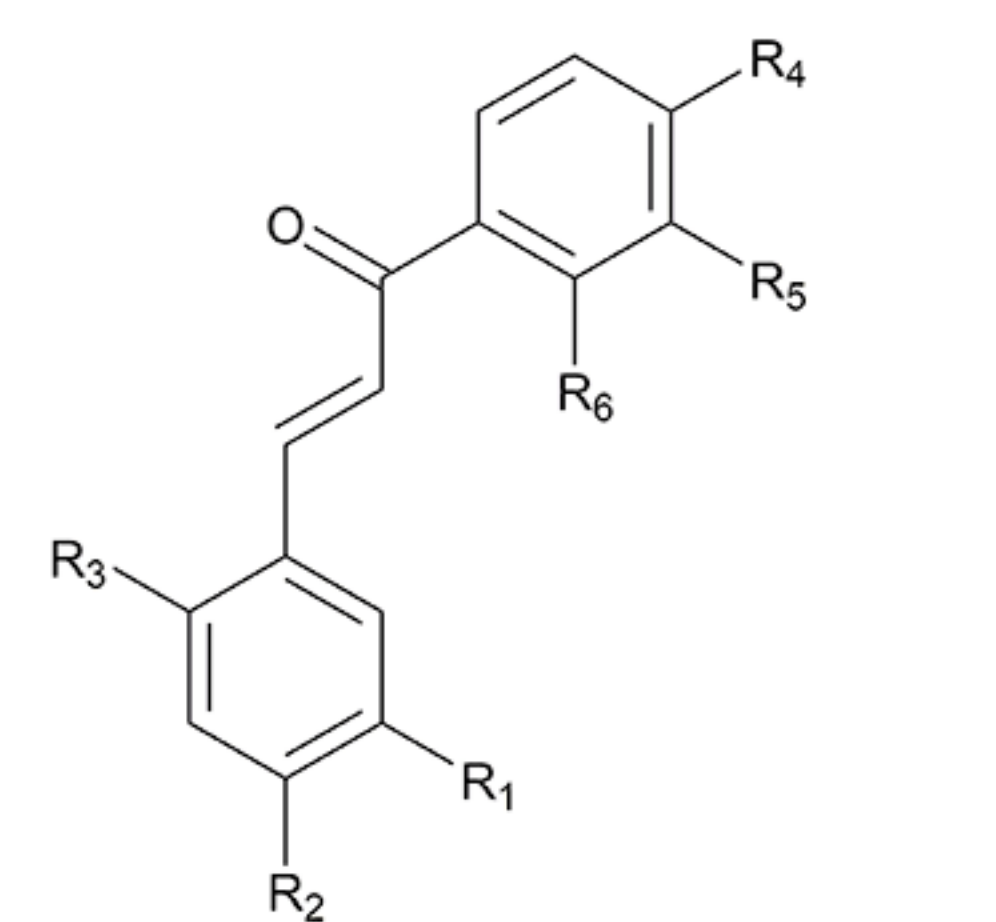

| No. | R1          | R2 | R3   | R4  | R5 | R6 |    |
|-----|-------------|----|------|-----|----|----|----|
| 61  | H           |    | OGlc | H   | OH | H  | OH |
| 62  | H           |    | OH   | OH  | OH | OH | H  |
| 63  | H           |    | OH   | OH  | OH | H  | H  |
| 64  | C(Me)2CHCH2 |    | OH   | OMe | OH | H  | H  |
| 65  | H           |    | OGlc | OH  | OH | H  | H  |

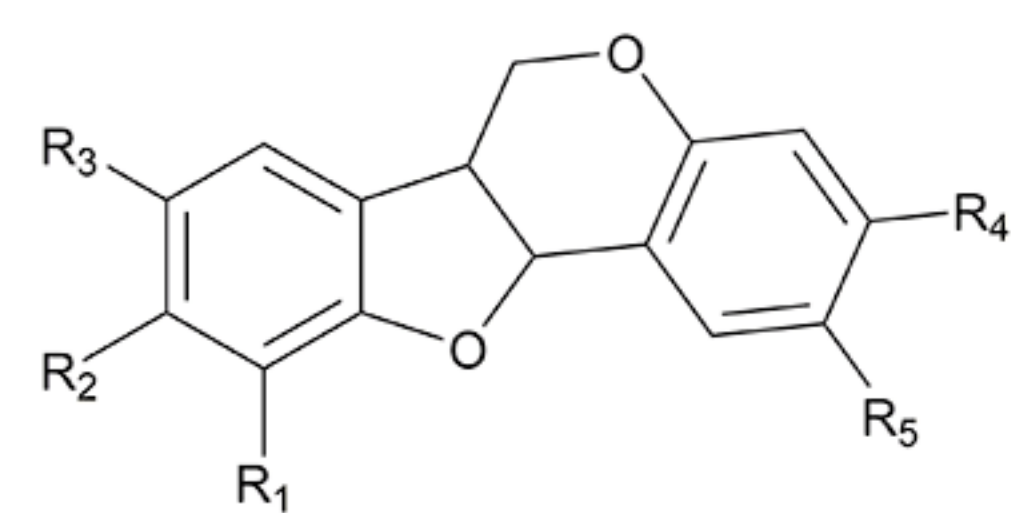

| No. | R1          | R2 | R3      | R4 | R5   |   |
|-----|-------------|----|---------|----|------|---|
| 66  | H           |    | -OCH2O- | OH | H    |   |
| 67  | H           |    | OMe     | H  | OH   | H |
| 68  | CH2CHC(Me)2 |    | OH      | H  | OH   | H |
| 69  | OMe         |    | OMe     | H  | OGlc | H |

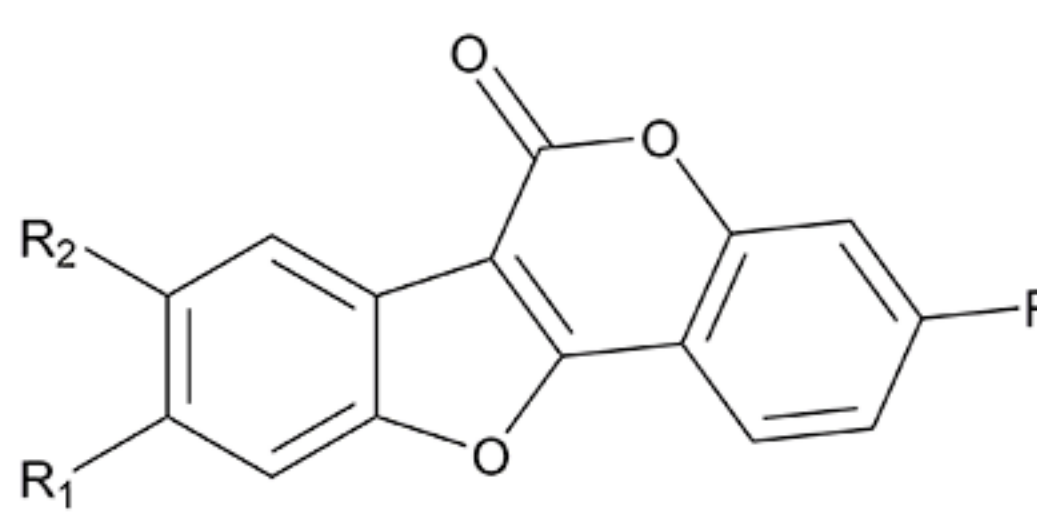

| No. | R1  | R2      | R3 |
|-----|-----|---------|----|
| 70  | OH  | H       | OH |
| 71  | OMe | H       | OH |
| 72  |     | -OCH2O- | OH |

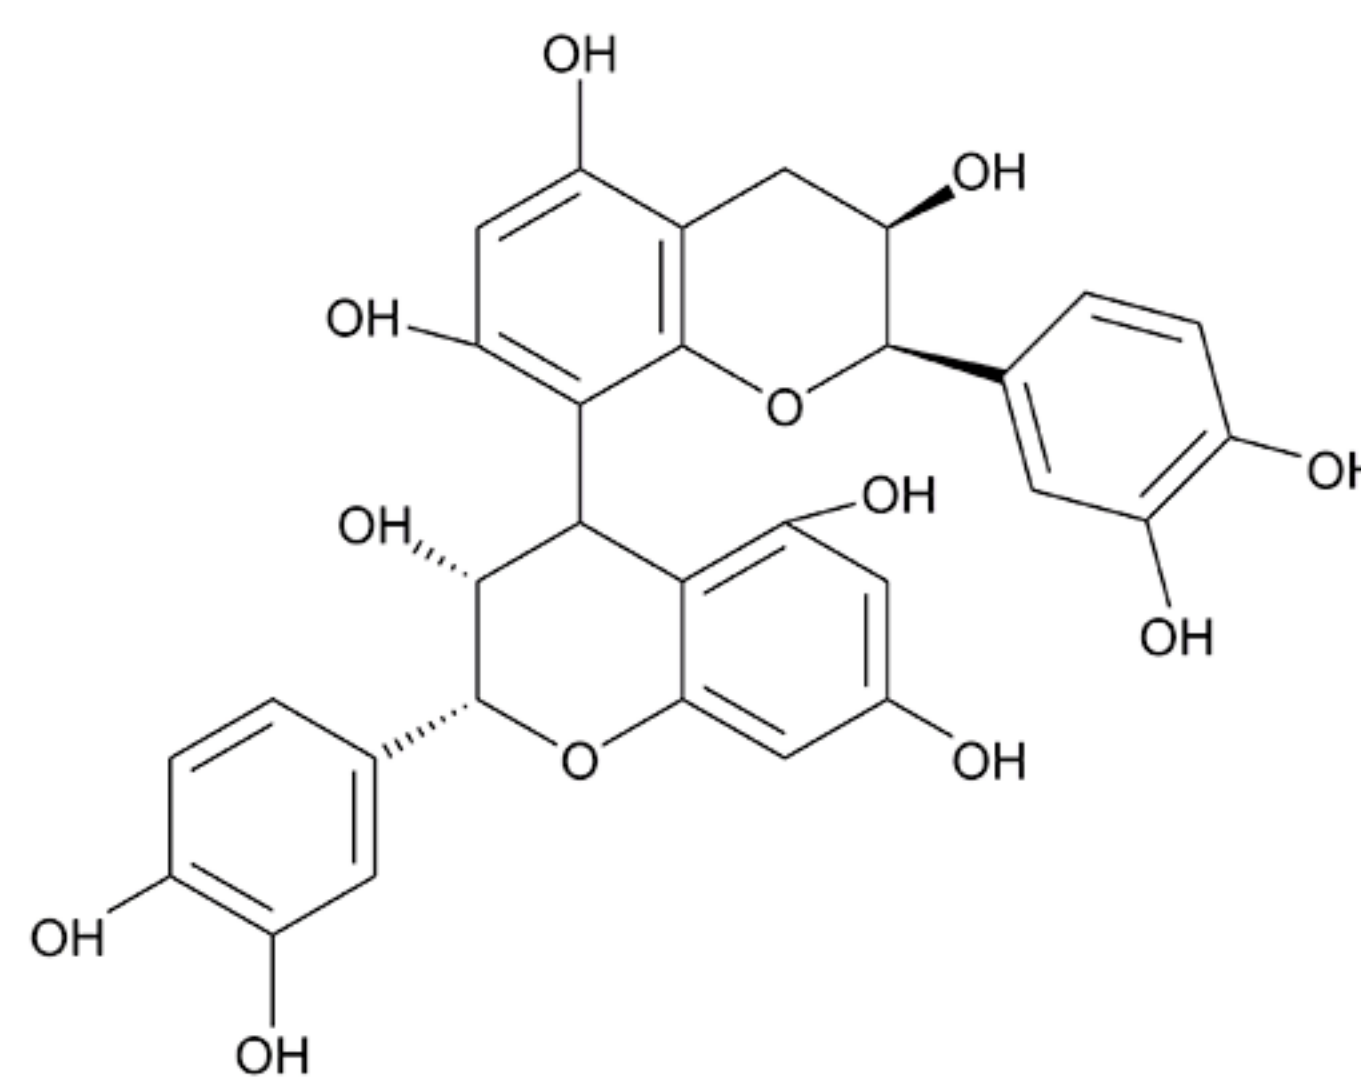

73

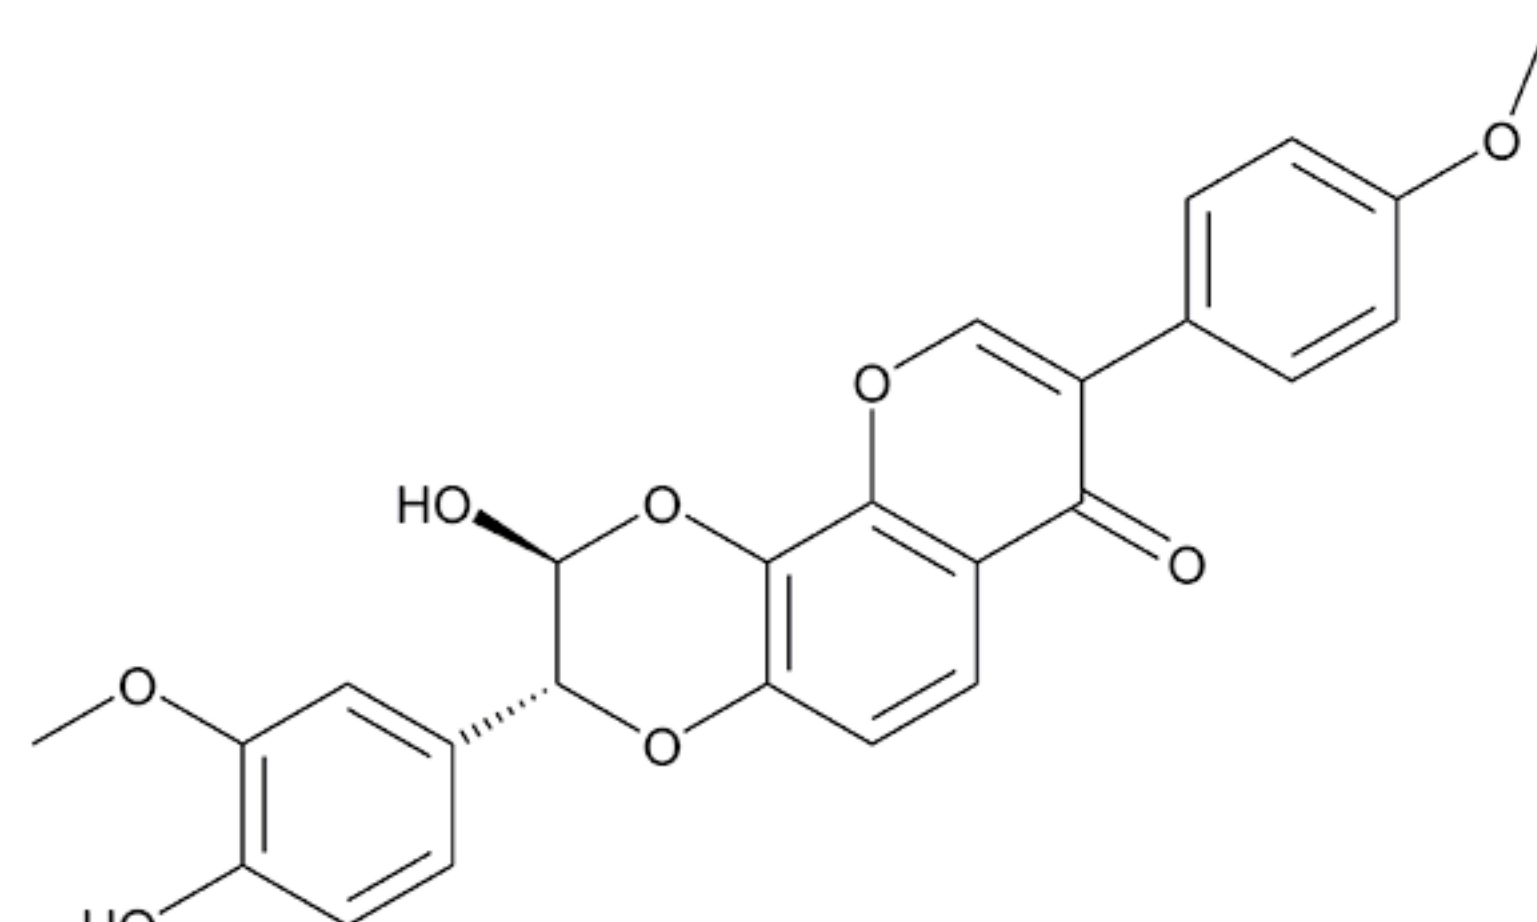

74

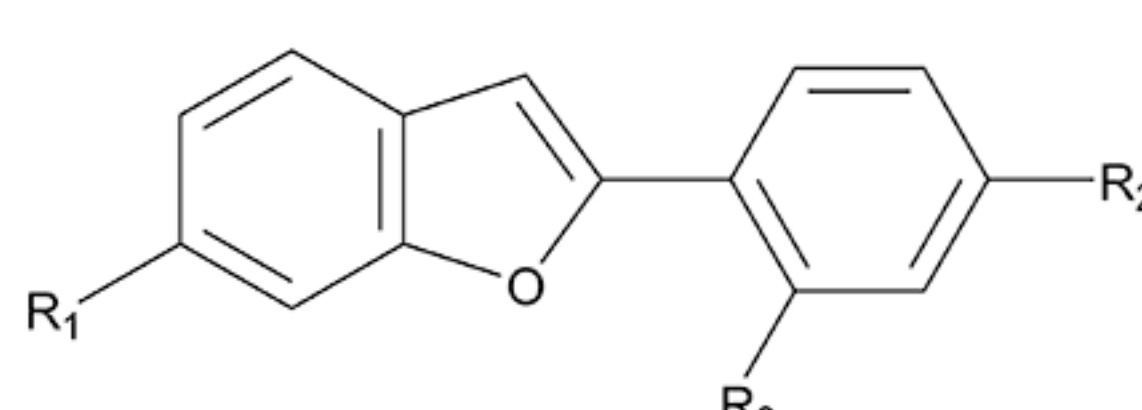

| No. | R1  | R2  | R3  |
|-----|-----|-----|-----|
| 75  | OH  | OMe | OH  |
| 76  | OMe | OH  | OMe |

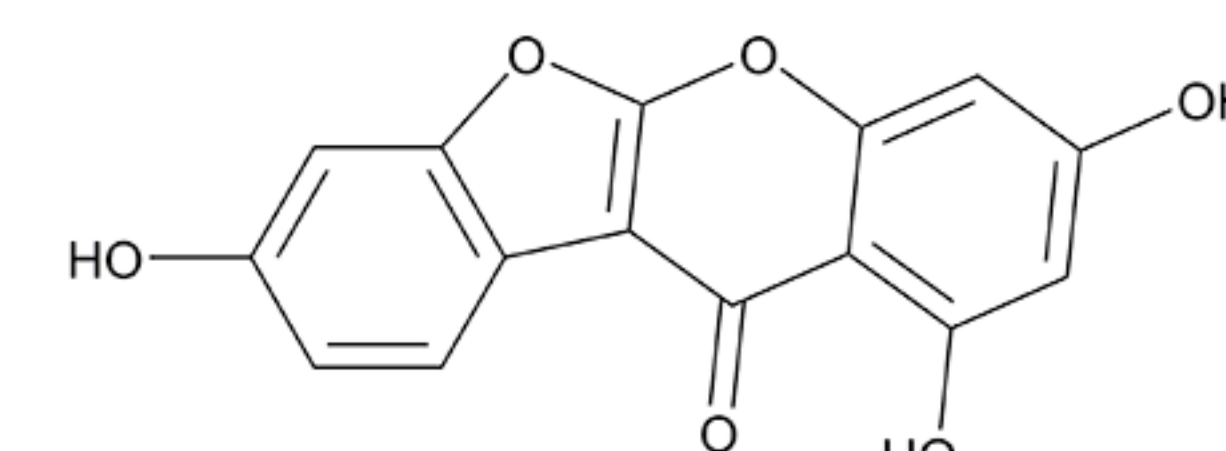

77

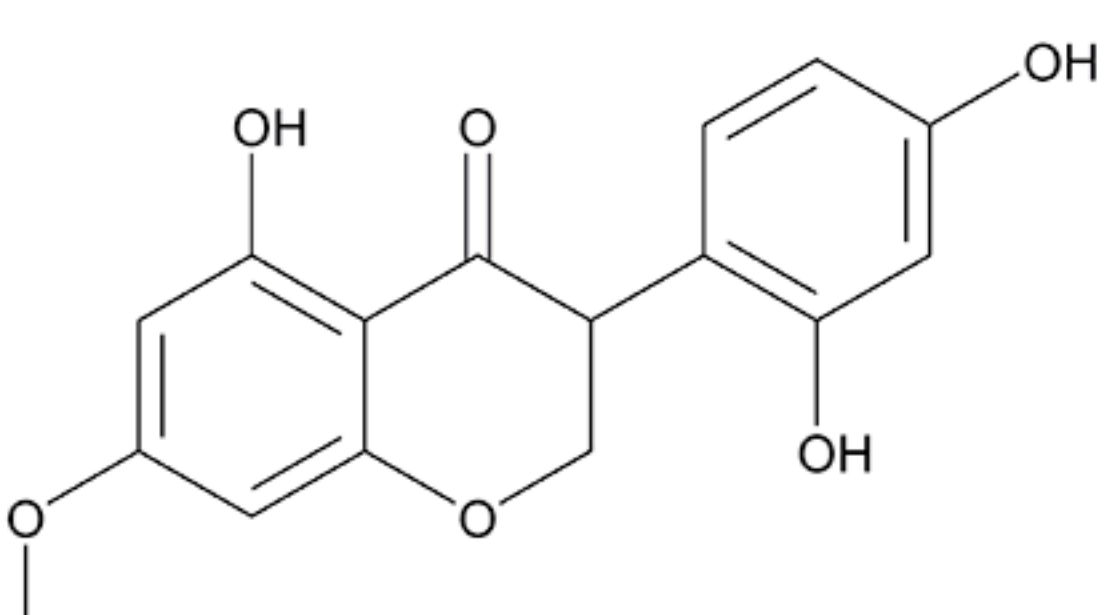

78

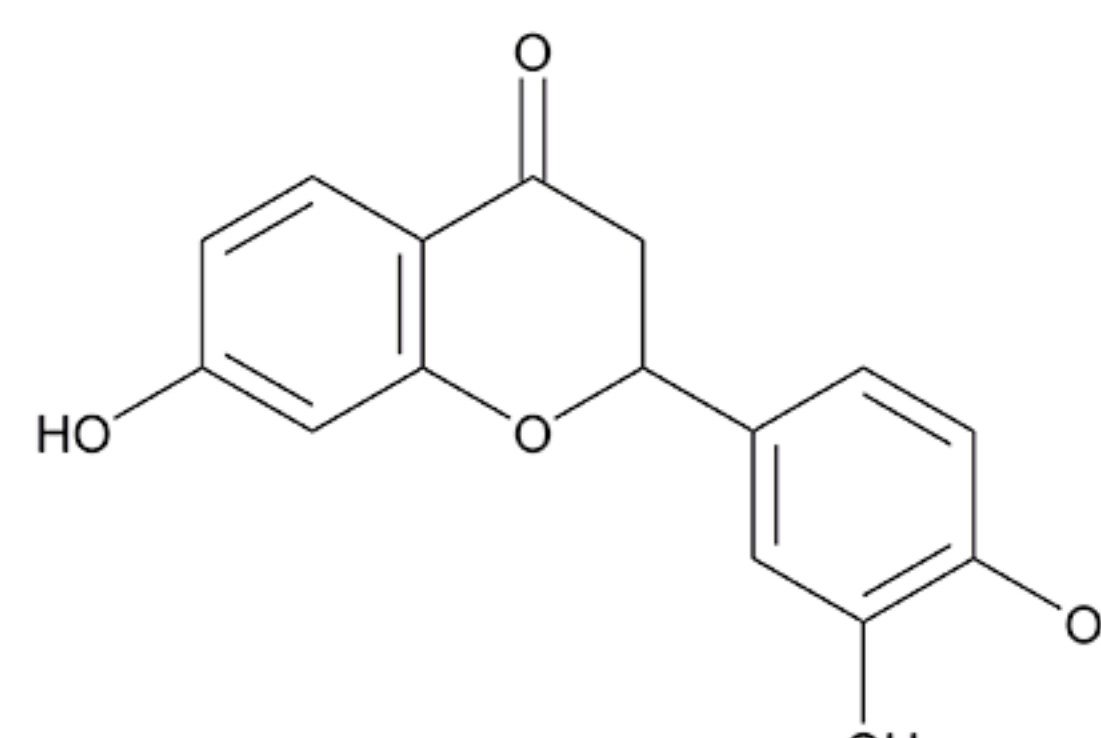

79

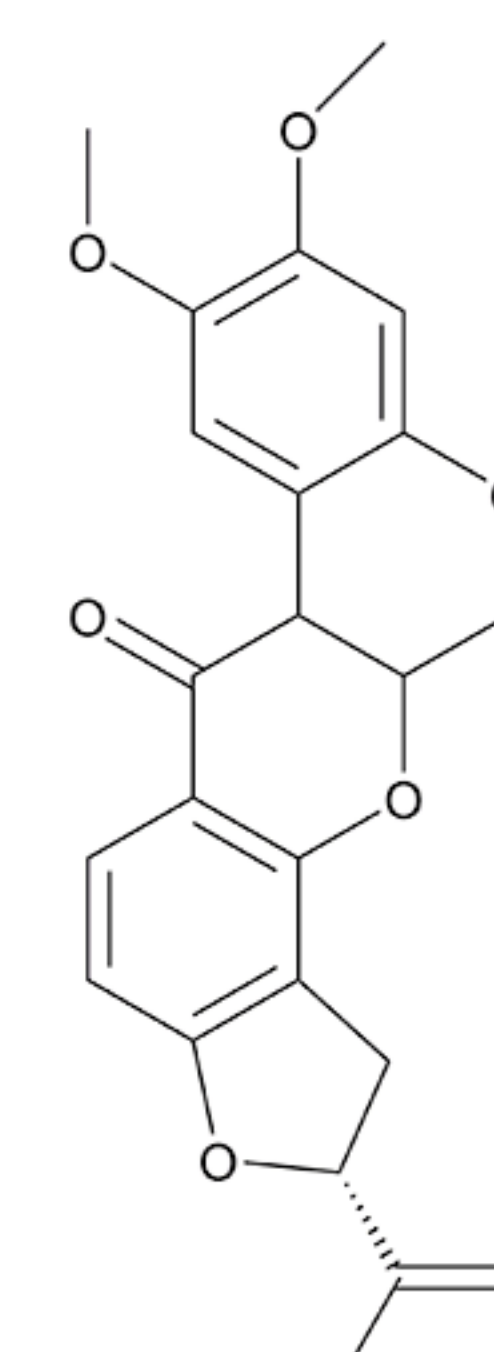

80

Supplementary Fig. 1. Structures of flavonoids isolated from the genus *Spatholobus*.



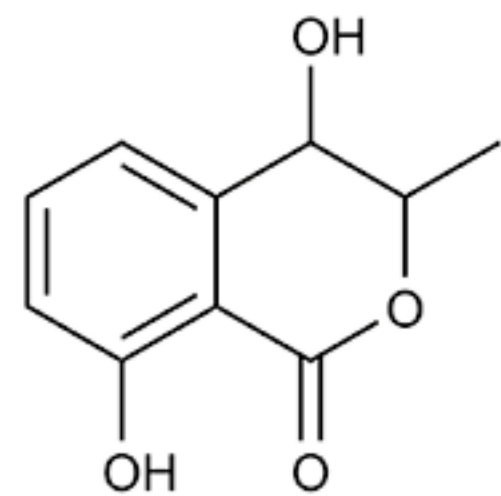

81

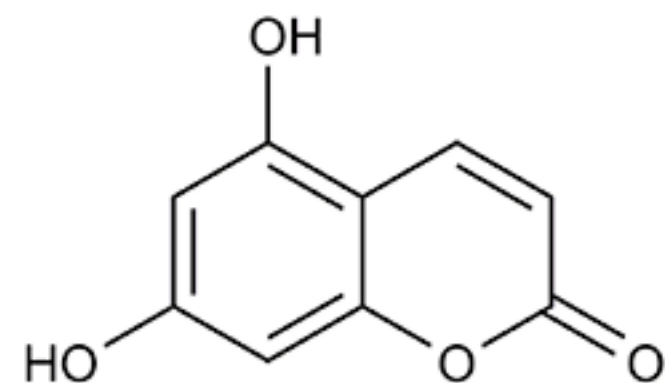

82

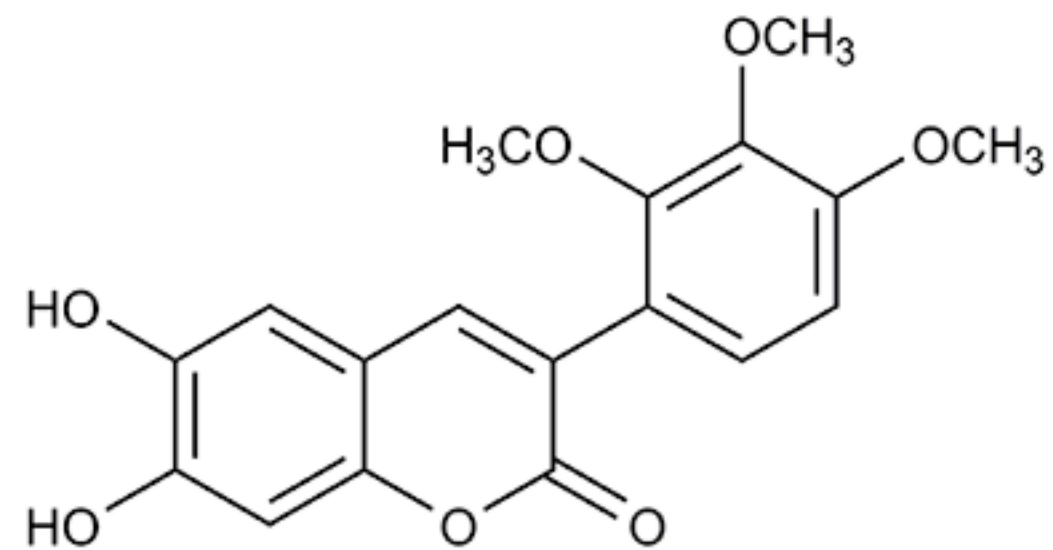

83

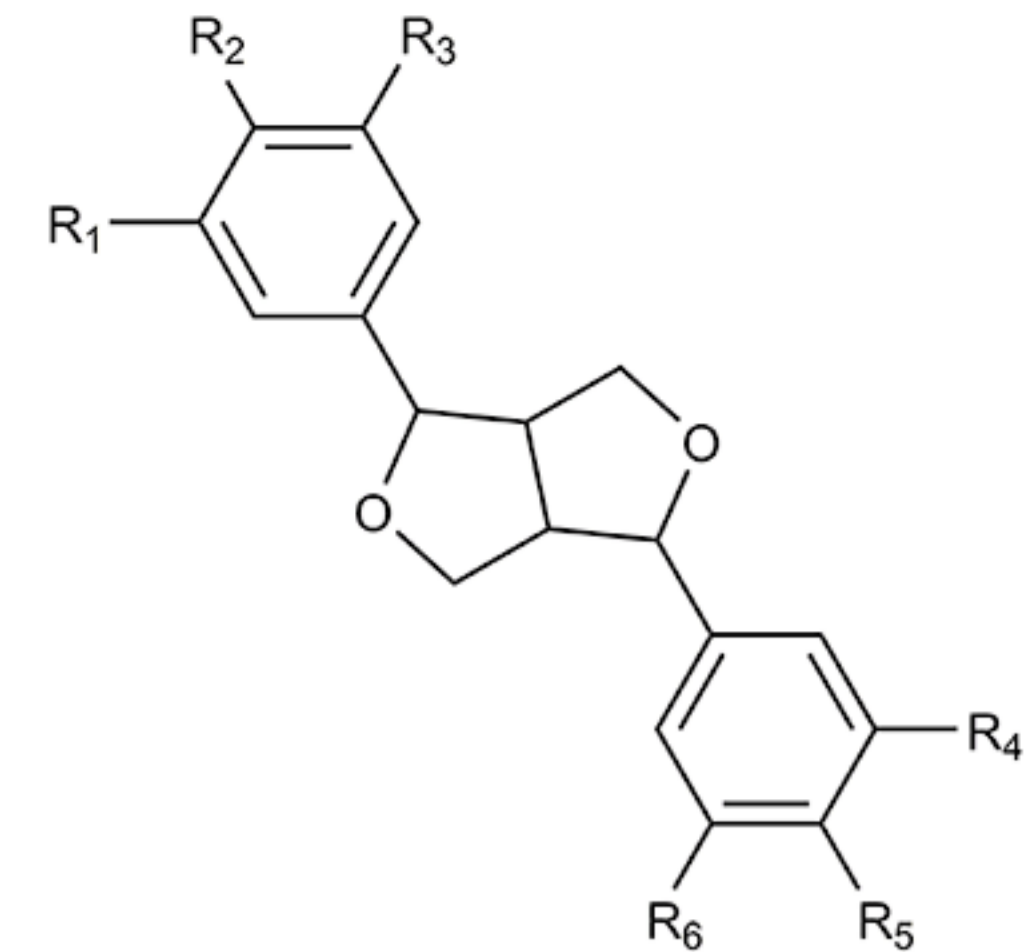

| No. | R1  | R2 | R3  | R4  | R5 | R6  |
|-----|-----|----|-----|-----|----|-----|
| 84  | OMe | OH | OMe | H   | OH | OMe |
| 85  | OMe | OH | OMe | OMe | OH | OMe |
| 86  | OMe | OH | H   | H   | OH | OMe |

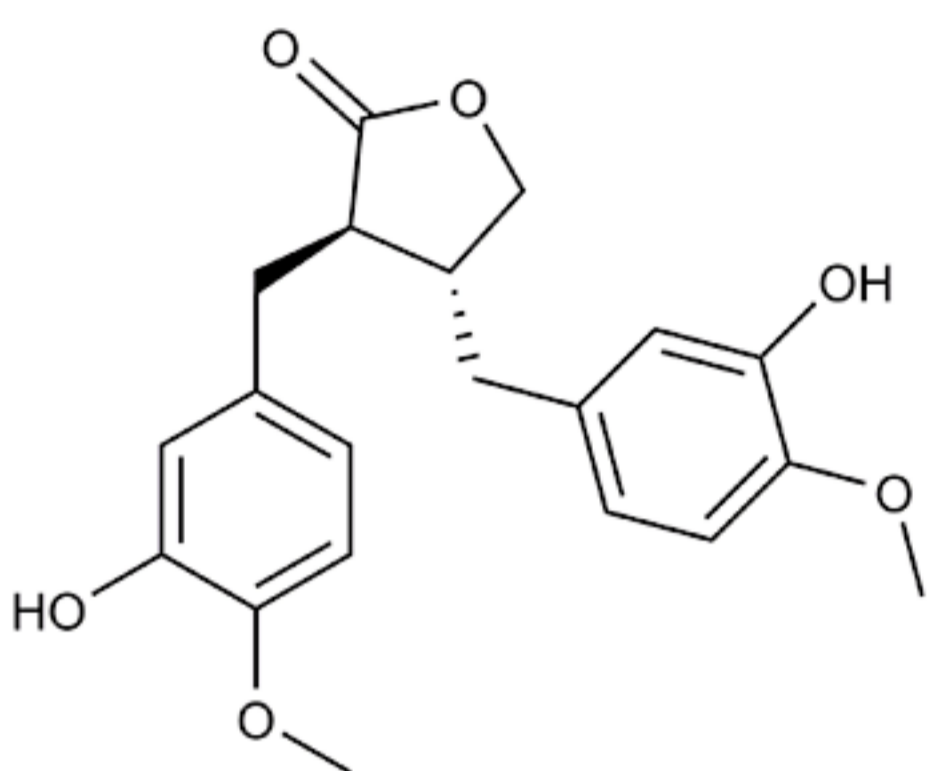

87

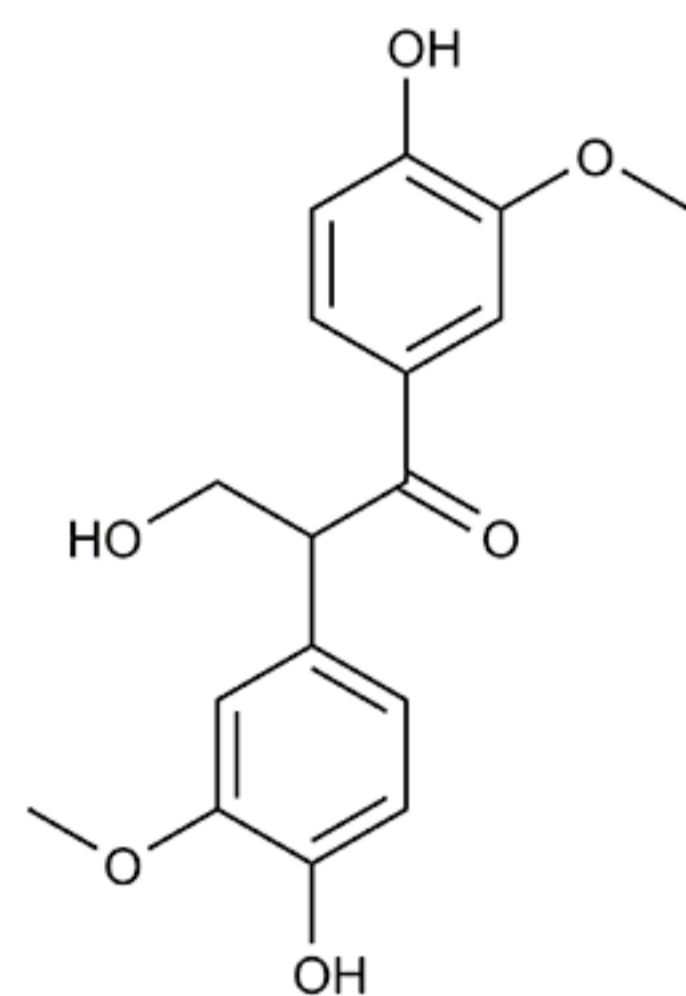

88

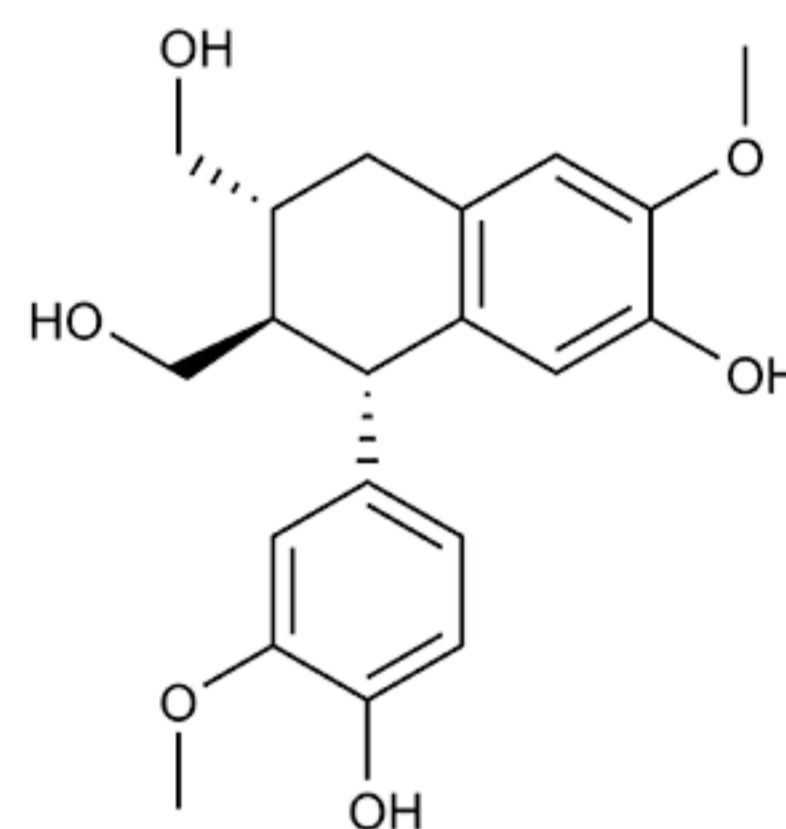

89

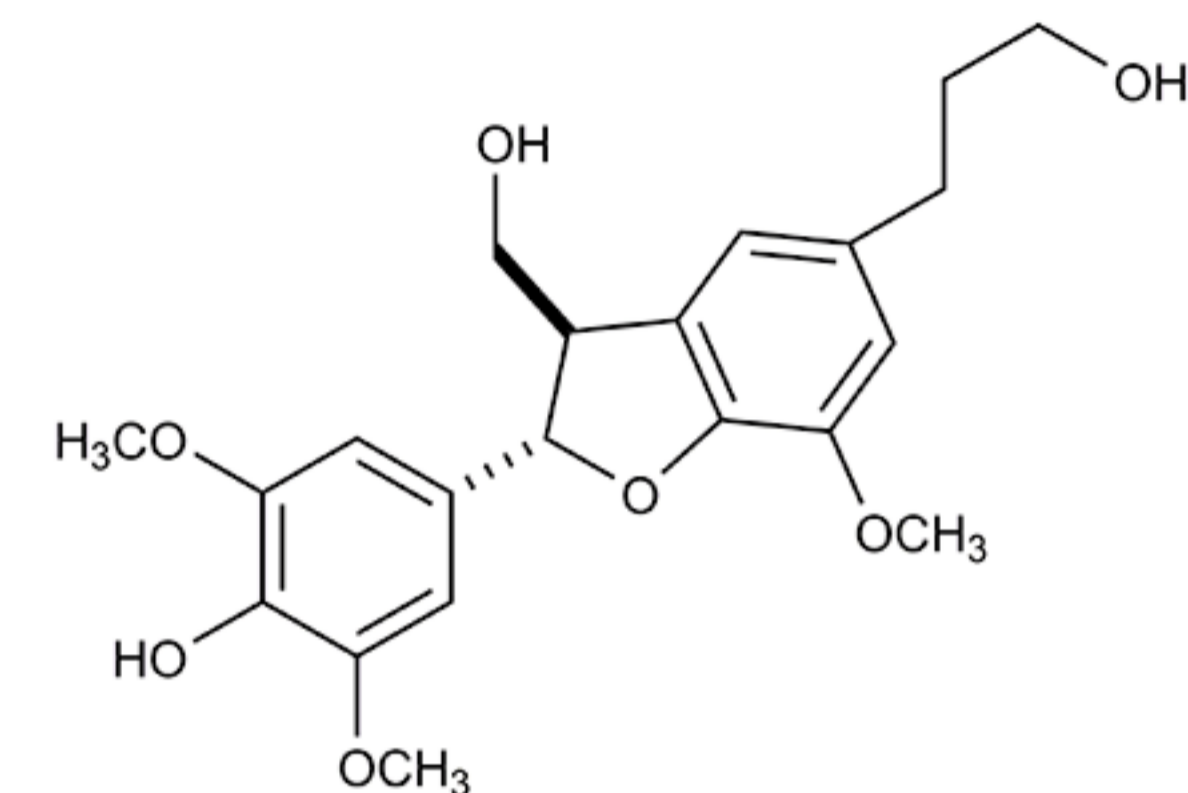

90

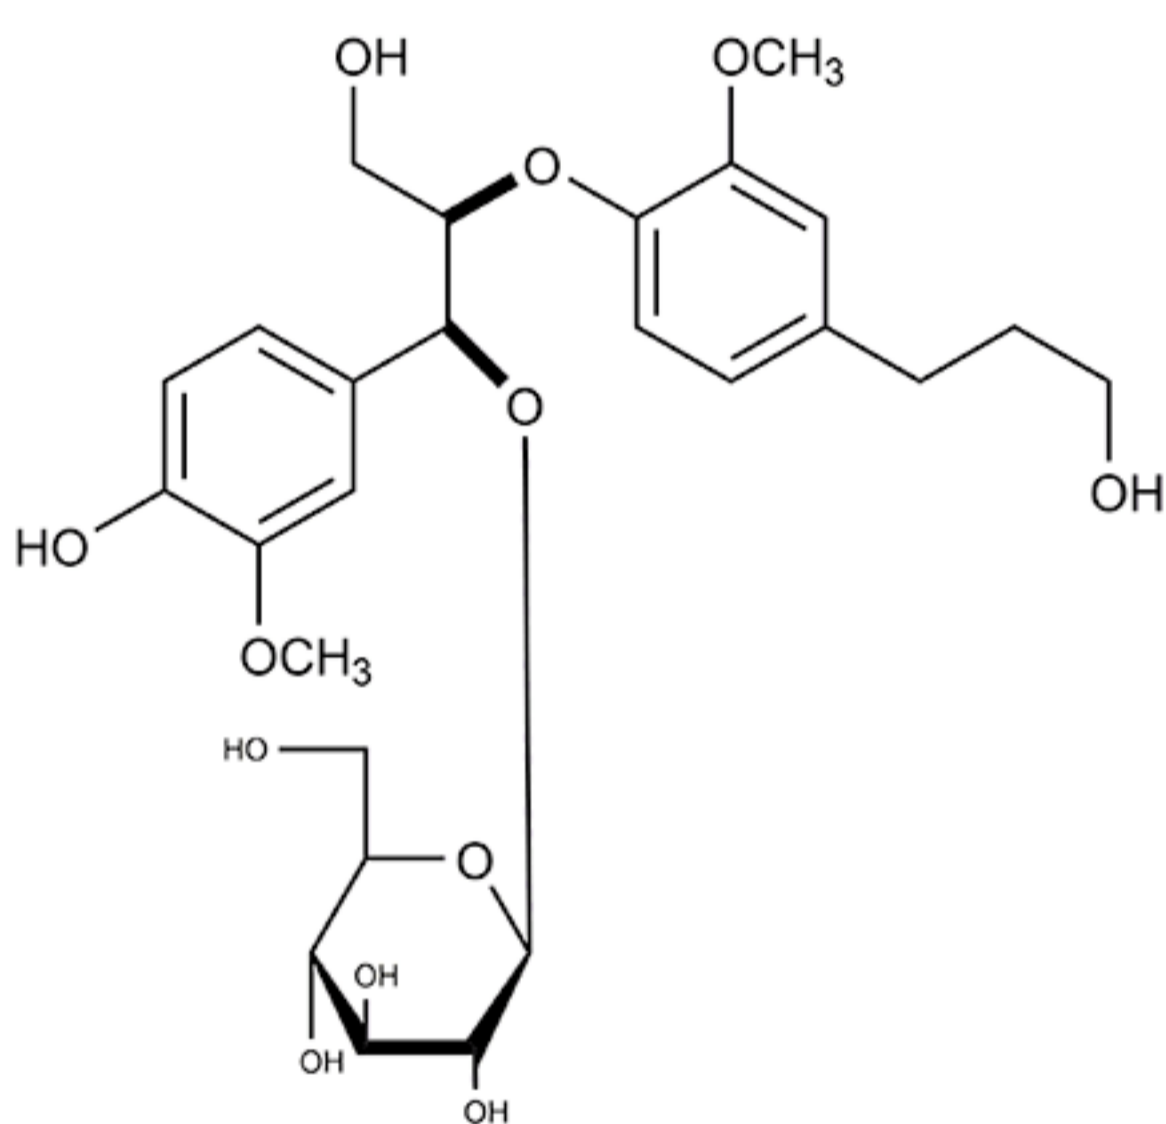

91

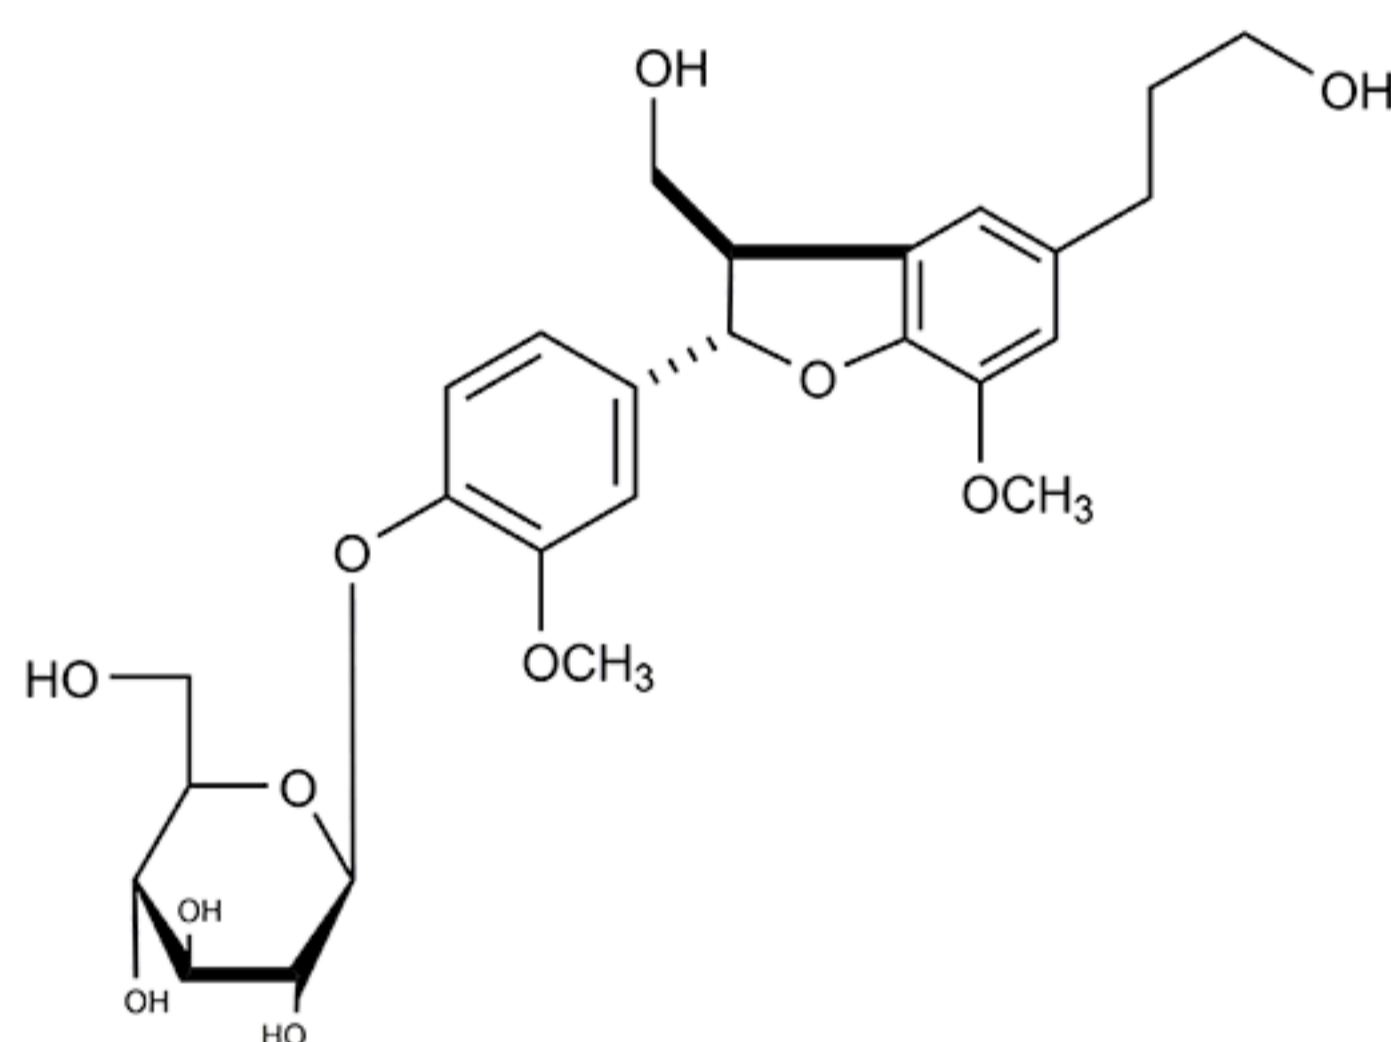

92

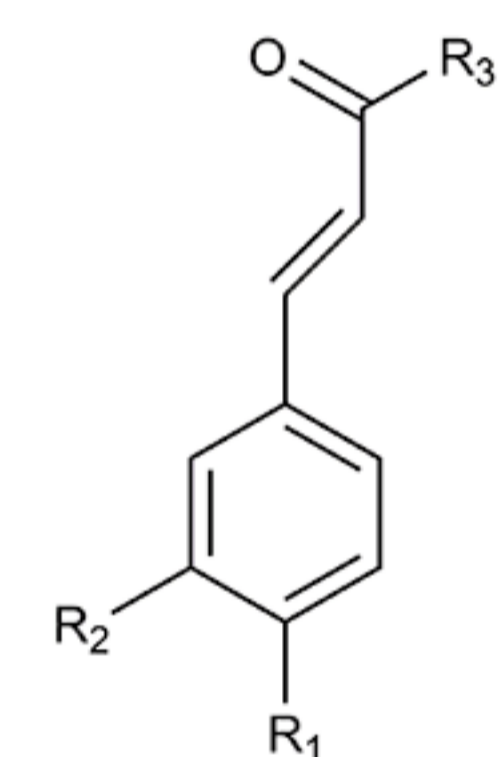

| No. | R1 | R2  | R3  |
|-----|----|-----|-----|
| 93  | OH | OMe | OMe |
| 95  | OH | H   | OH  |
| 96  | OH | OMe | OH  |

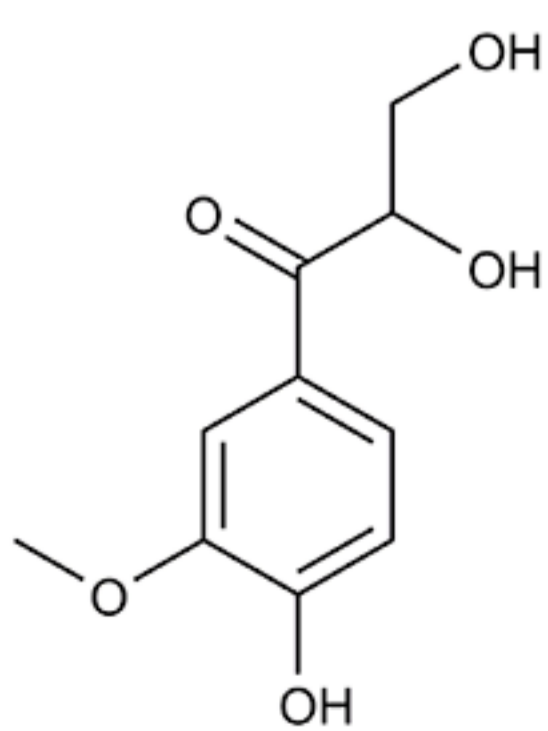

94

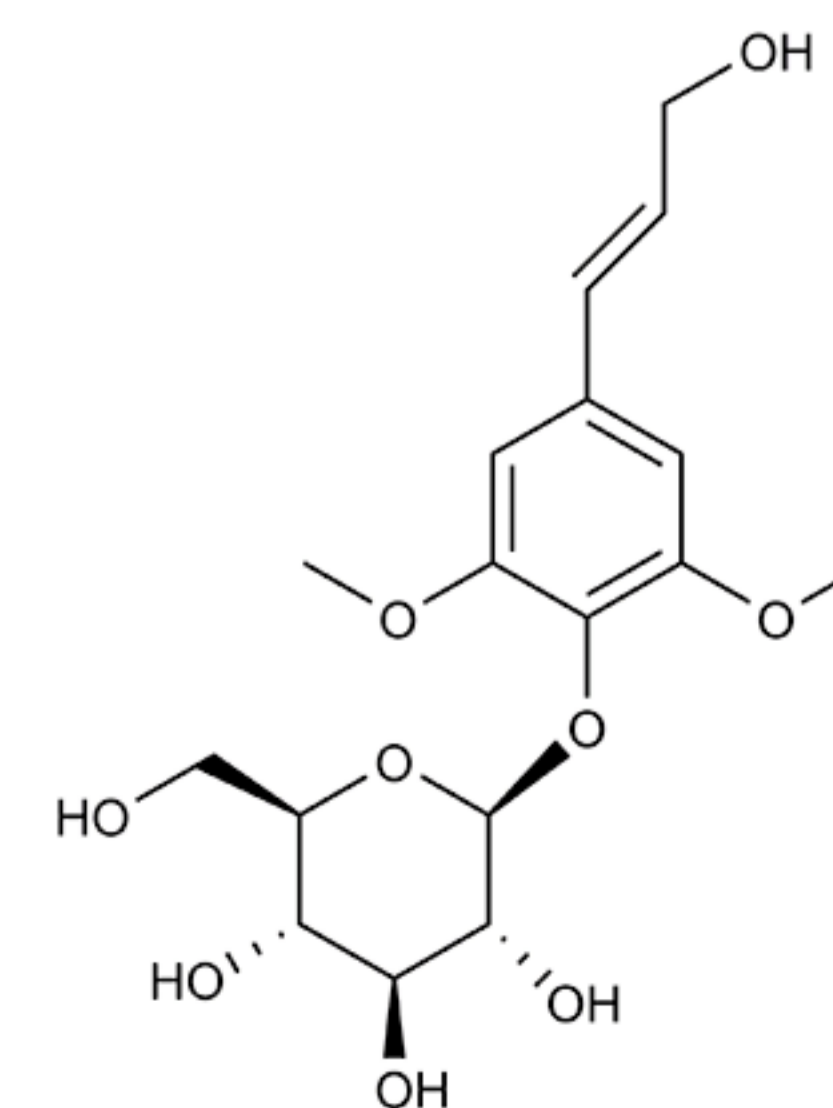

97

Supplementary Fig. 2. Structures of phenylpropanoids isolated from the genus *Spatholobus*.

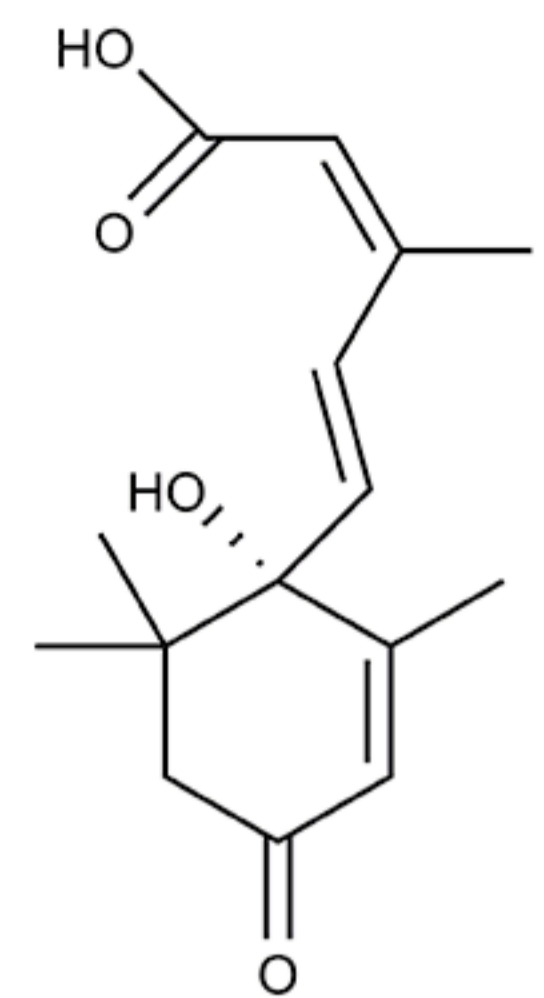

98

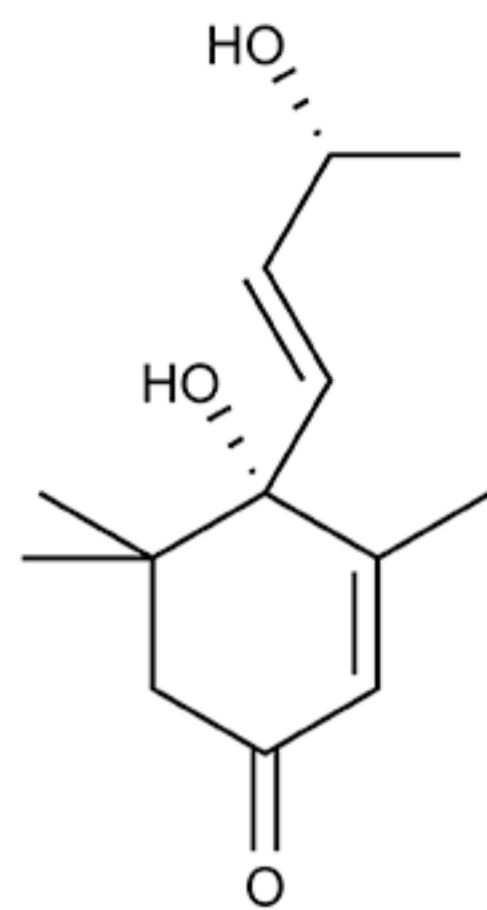

99

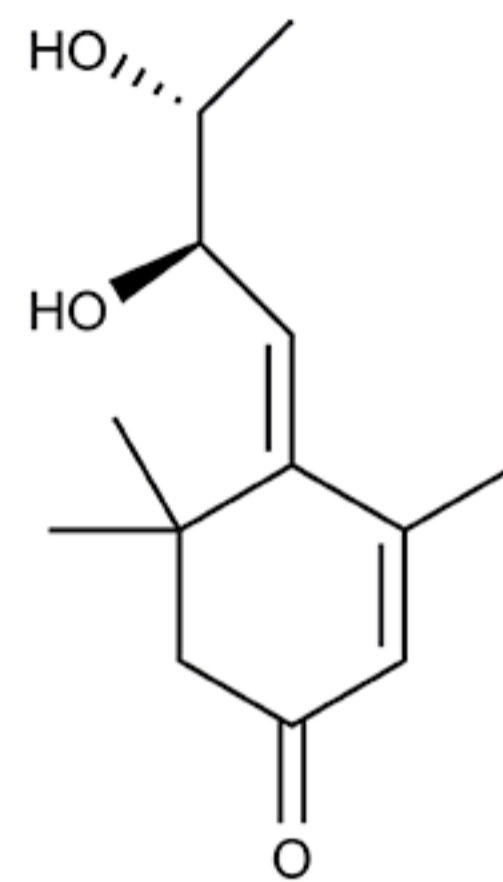

100

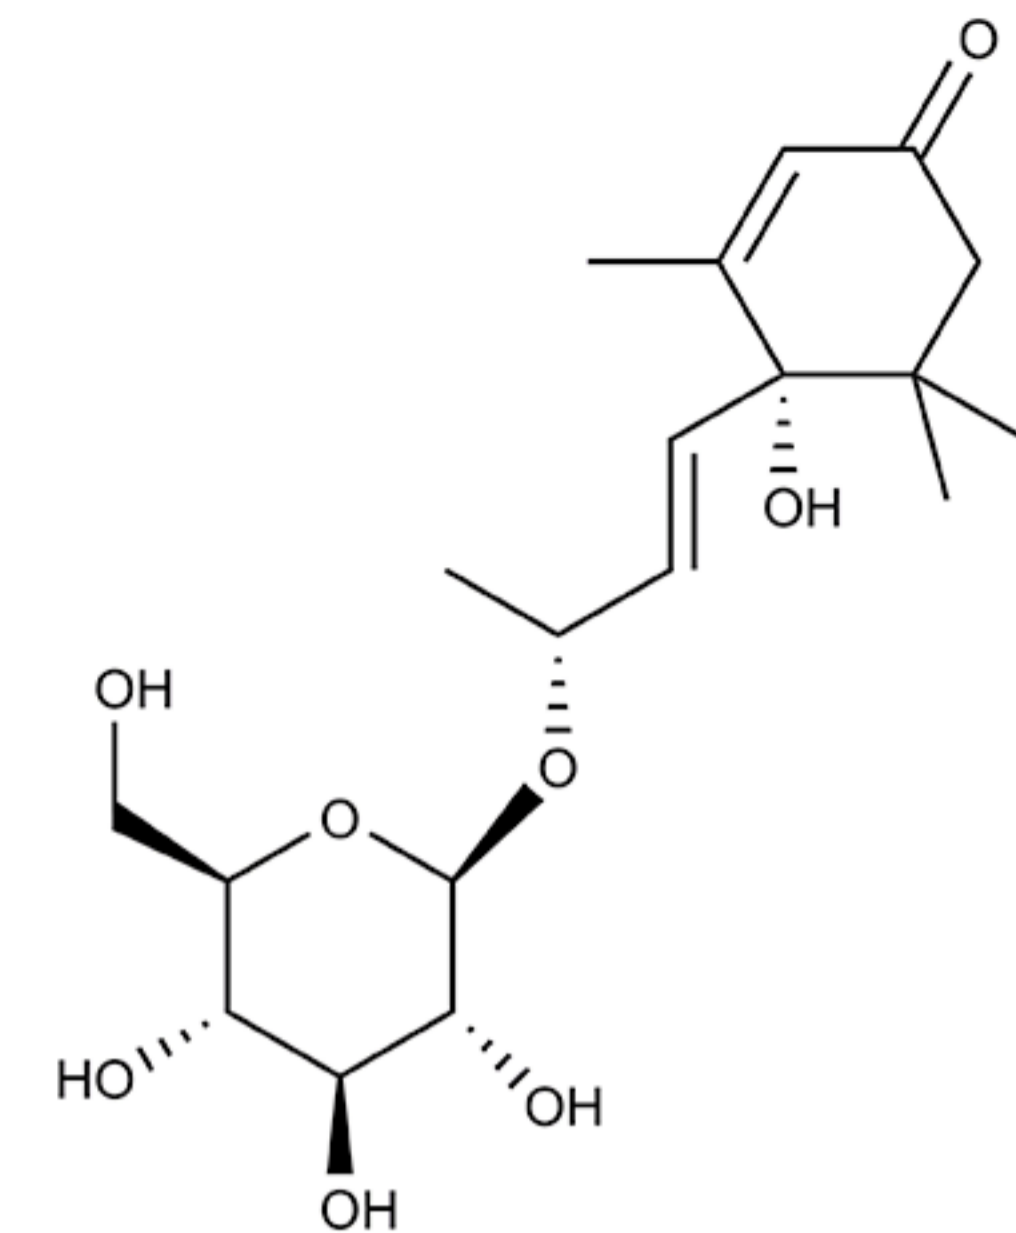

101

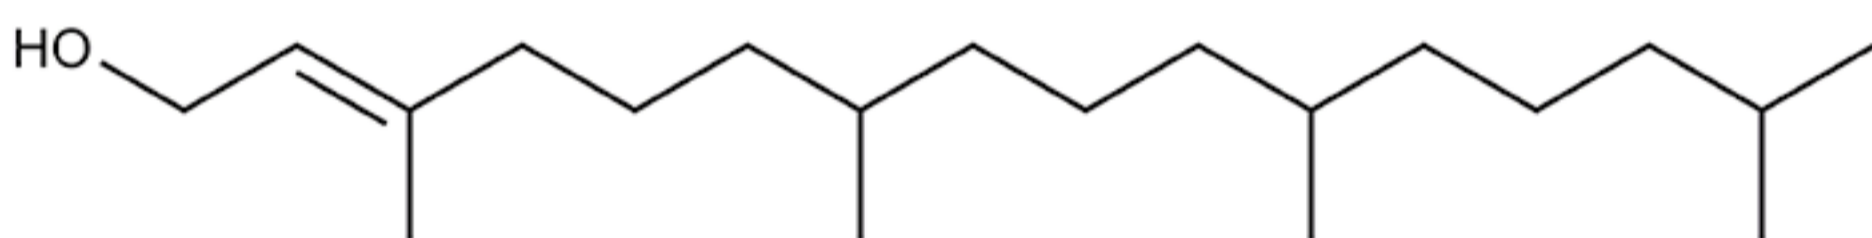

102

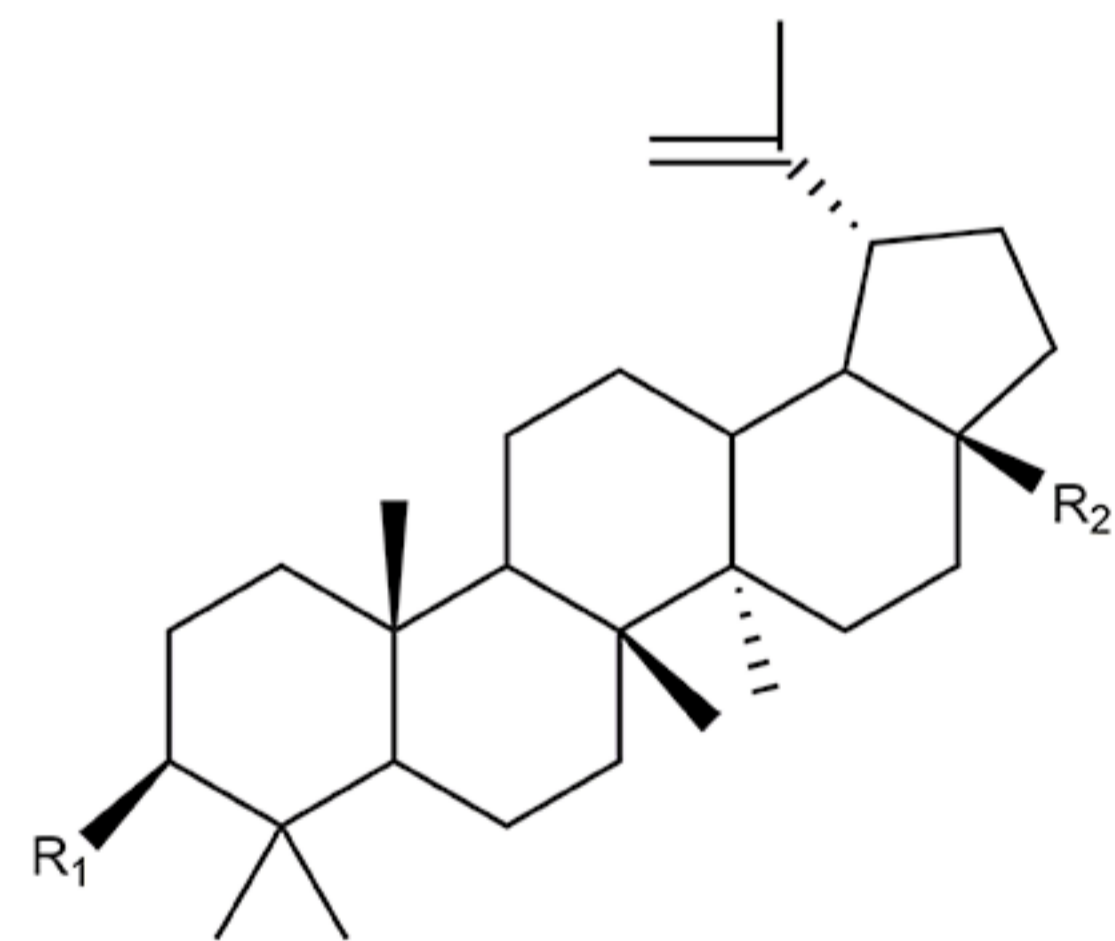

| No. | R1 | R2   |
|-----|----|------|
| 103 | OH | Me   |
| 104 | O  | Me   |
| 105 | OH | COOH |

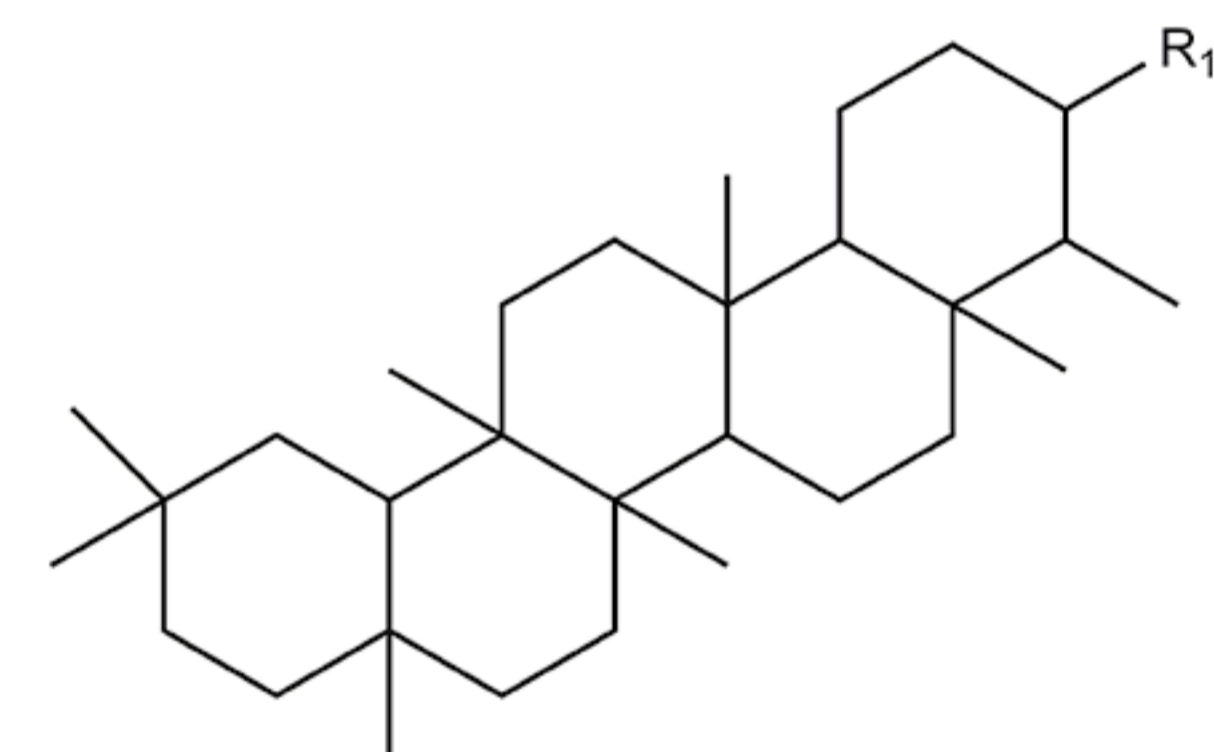

| No. | R1 |
|-----|----|
| 106 | OH |
| 107 | O  |

**Supplementary Fig. 3.** Structures of terpenoids isolated from the genus *Spatholobus*.

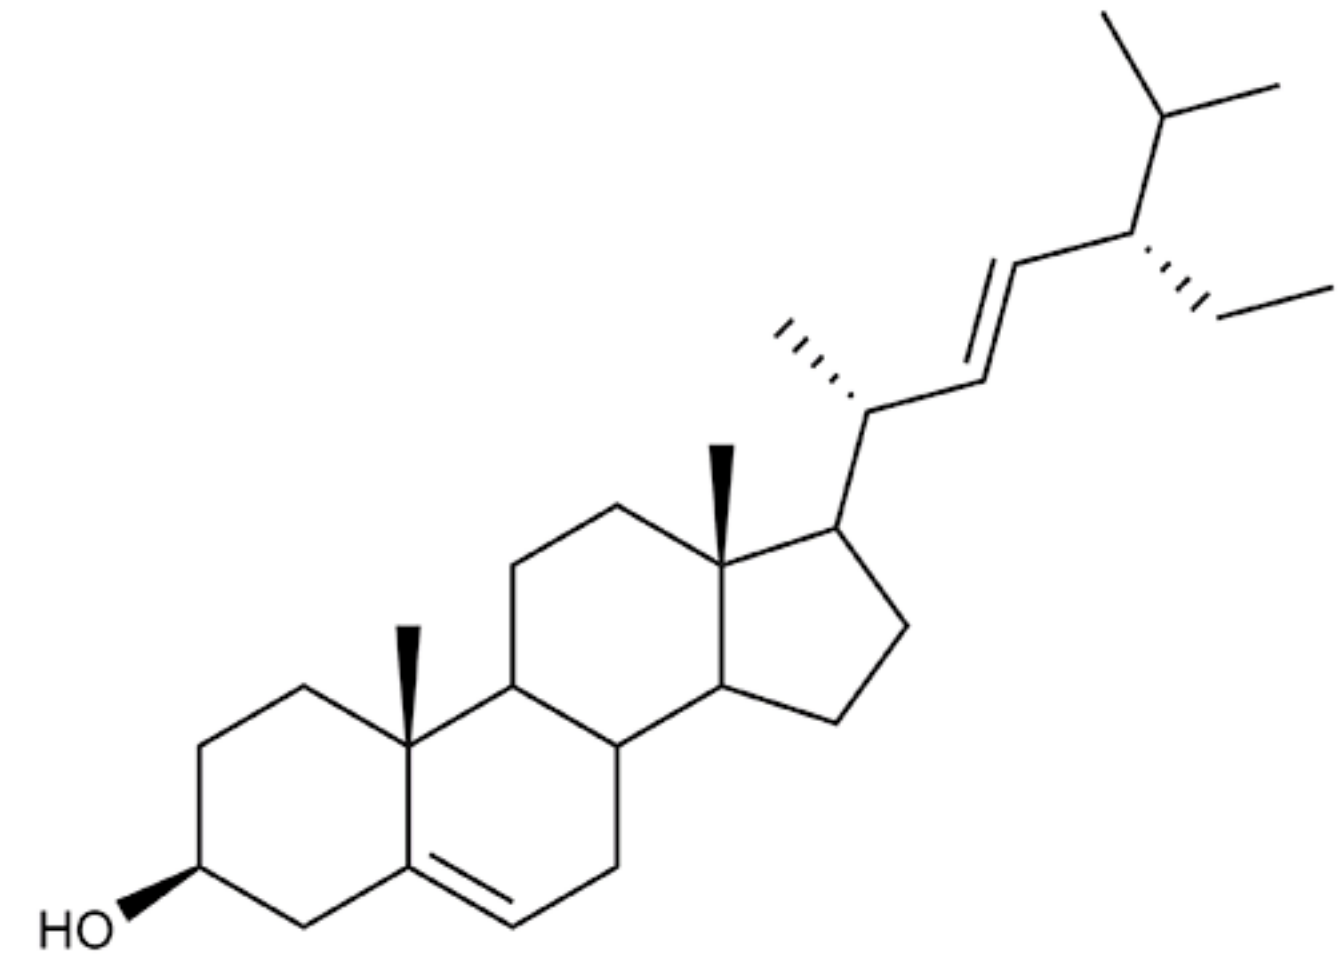

108

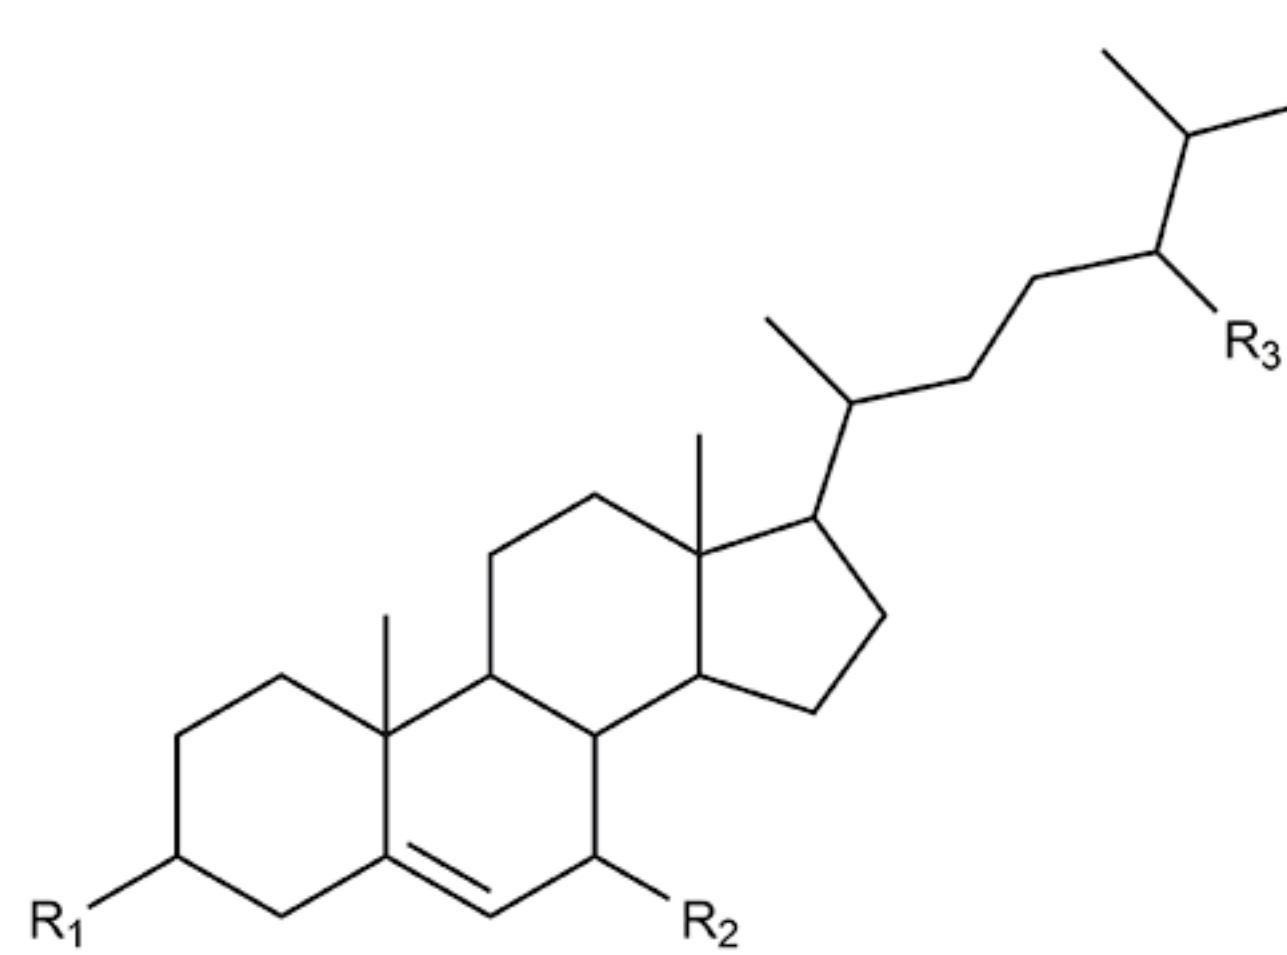

| No. | R1   | R2 | R3                              |
|-----|------|----|---------------------------------|
| 109 | OH   | H  | Me                              |
| 110 | OH   | H  | CH <sub>2</sub> CH <sub>3</sub> |
| 112 | OH   | OH | CH <sub>2</sub> CH <sub>3</sub> |
| 114 | OH   | O  | CH <sub>2</sub> CH <sub>3</sub> |
| 116 | OGlc | H  | CH <sub>2</sub> CH <sub>3</sub> |

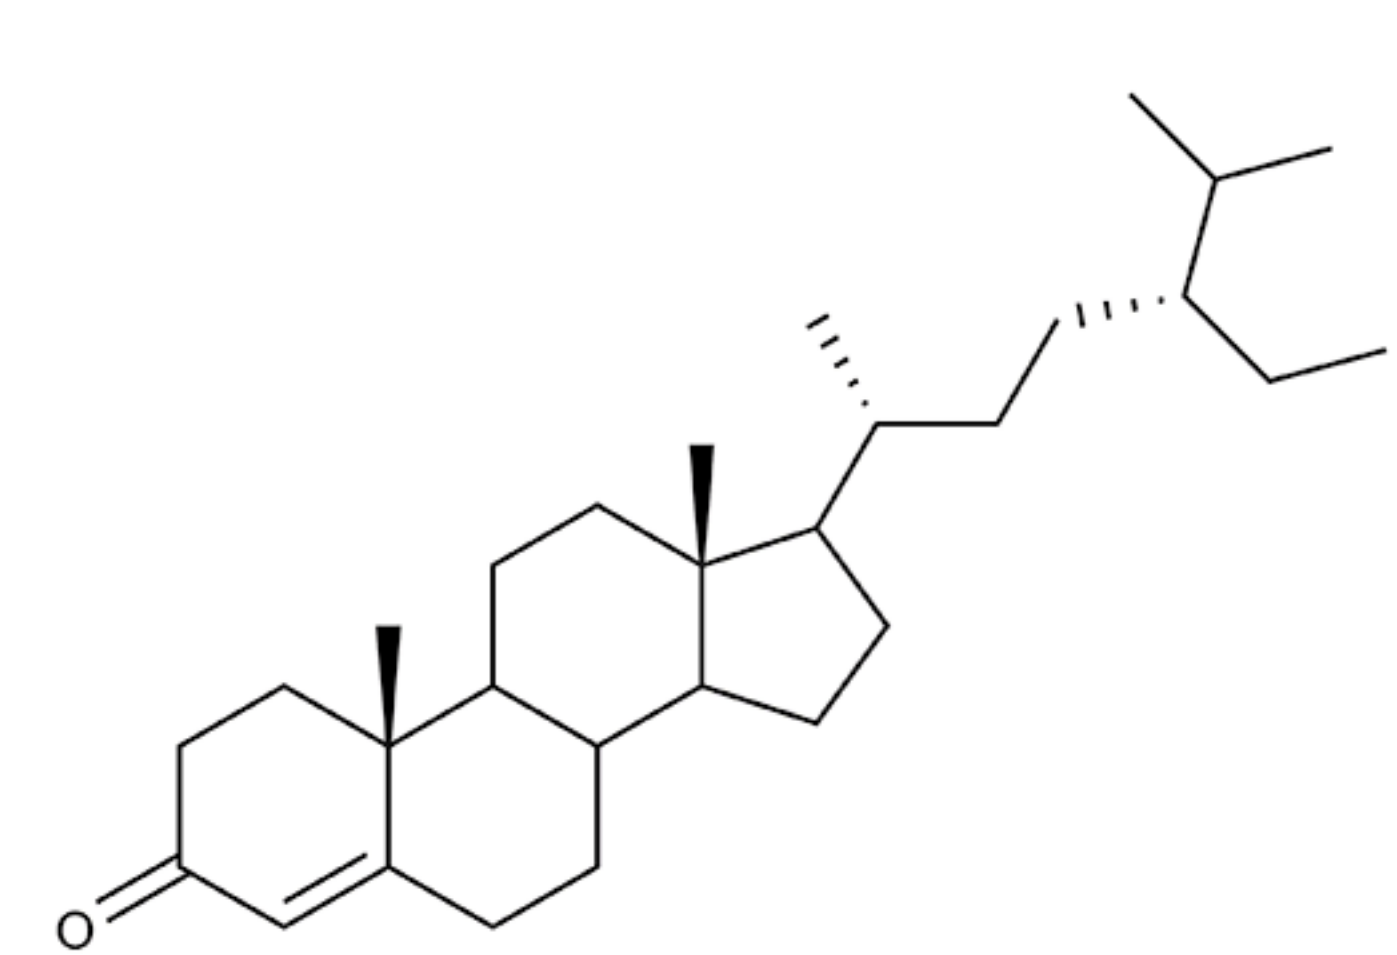

111

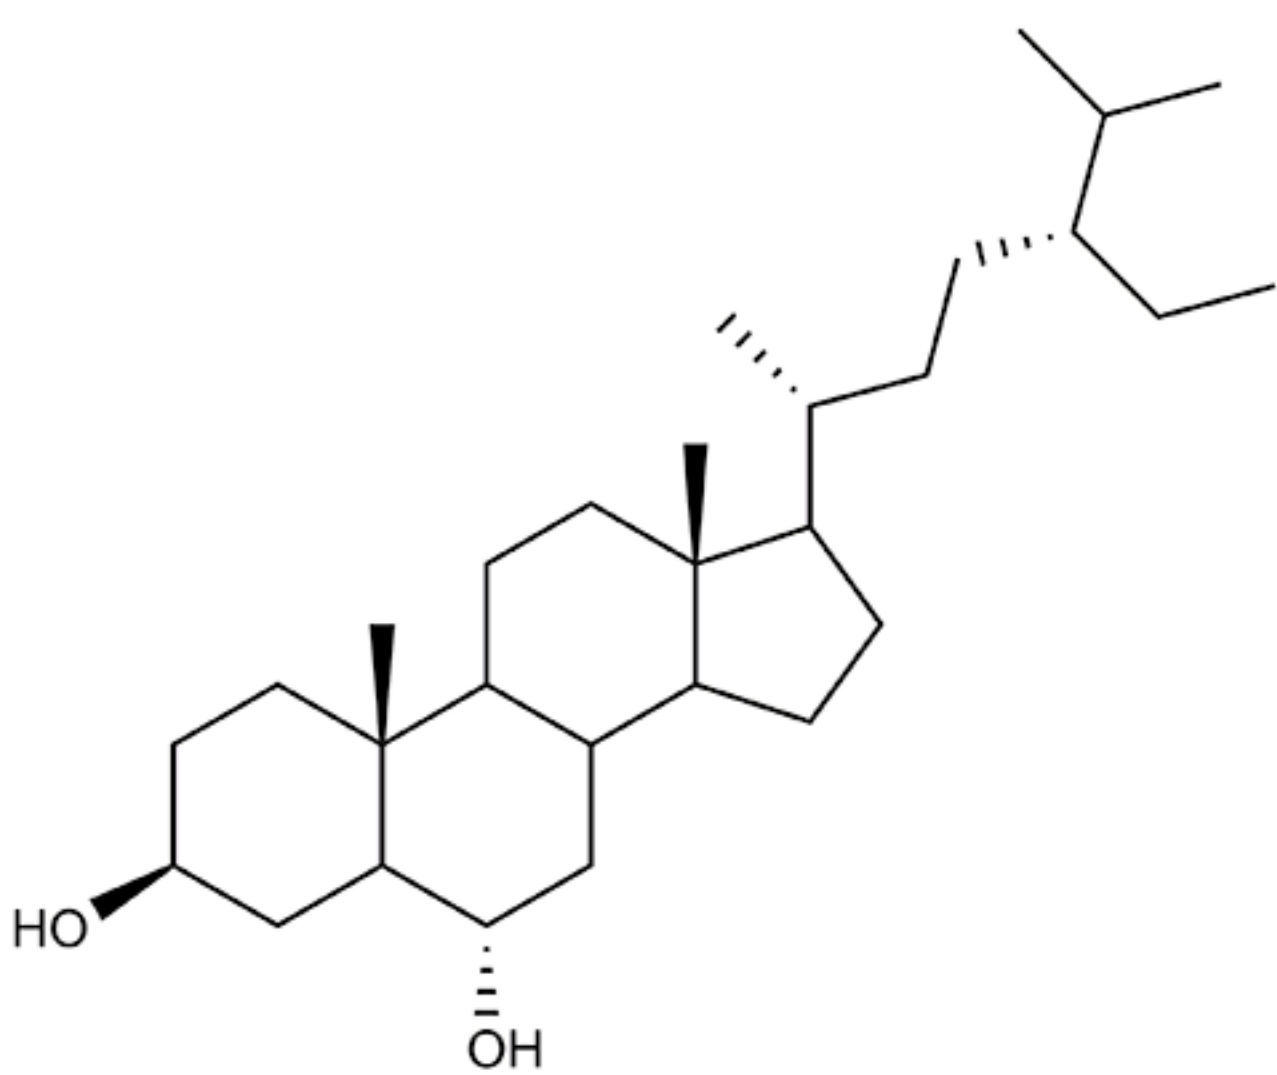

113

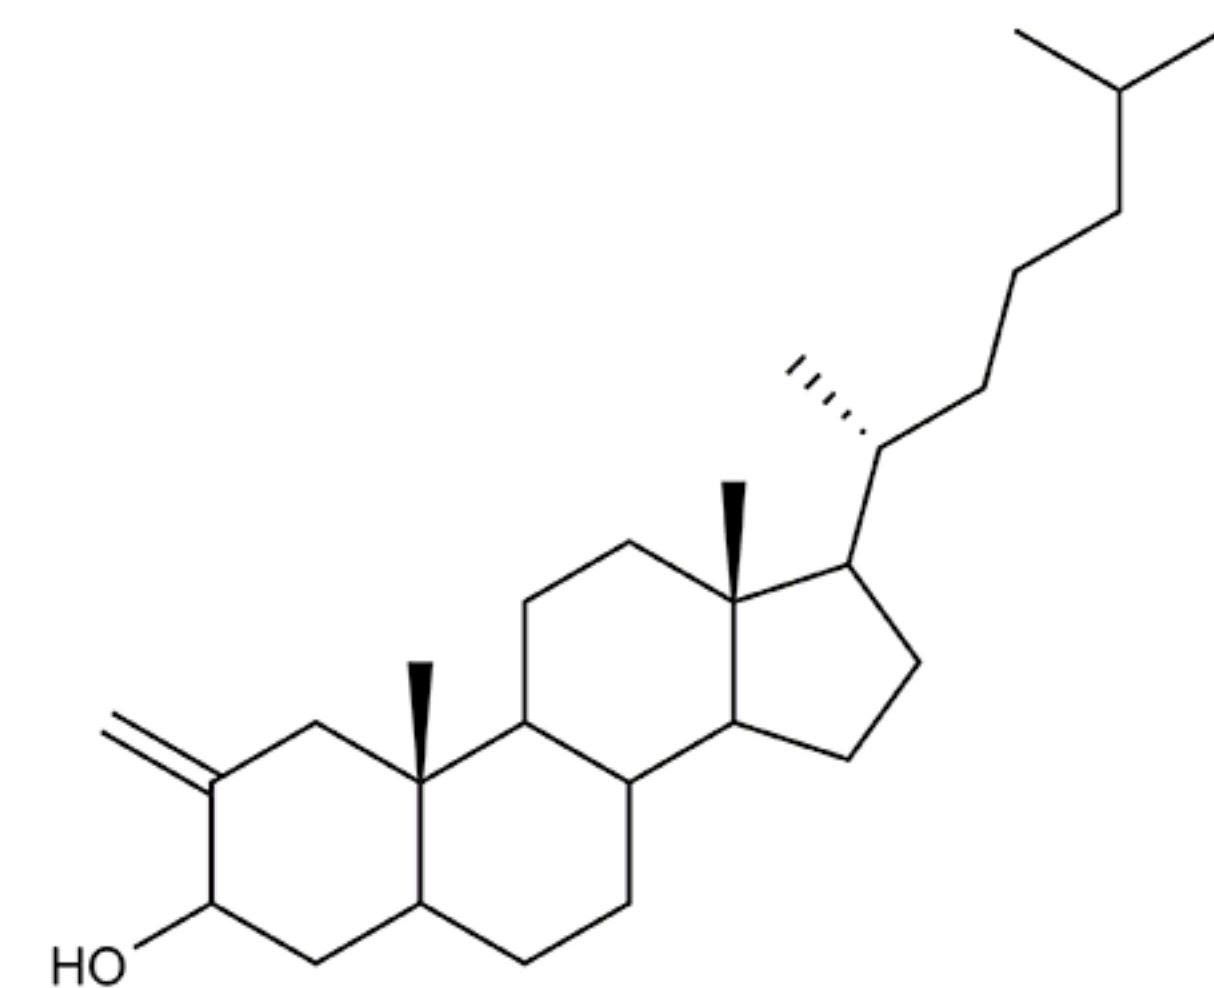

115

**Supplementary Fig. 4.** Structures of phytosterols isolated from the genus *Spatholobus*.



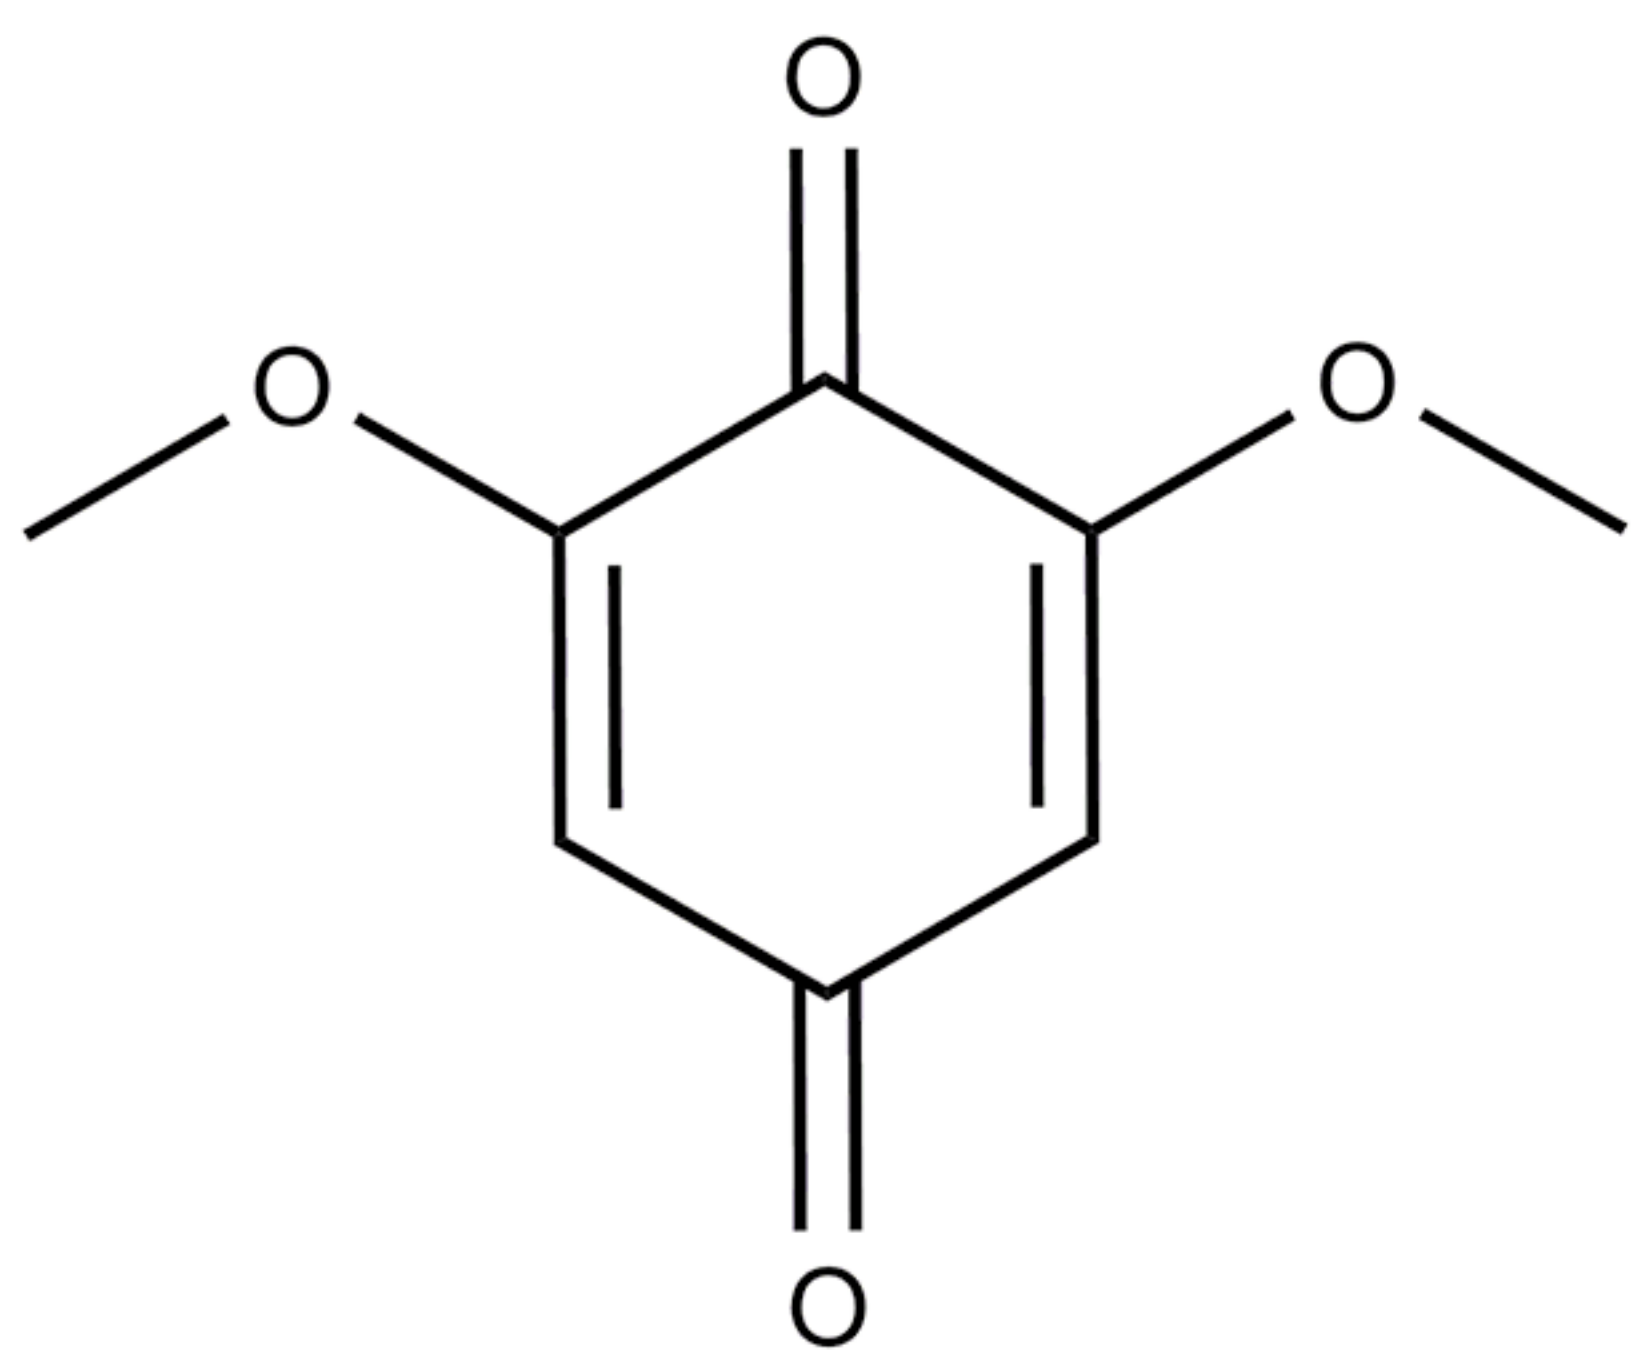

117

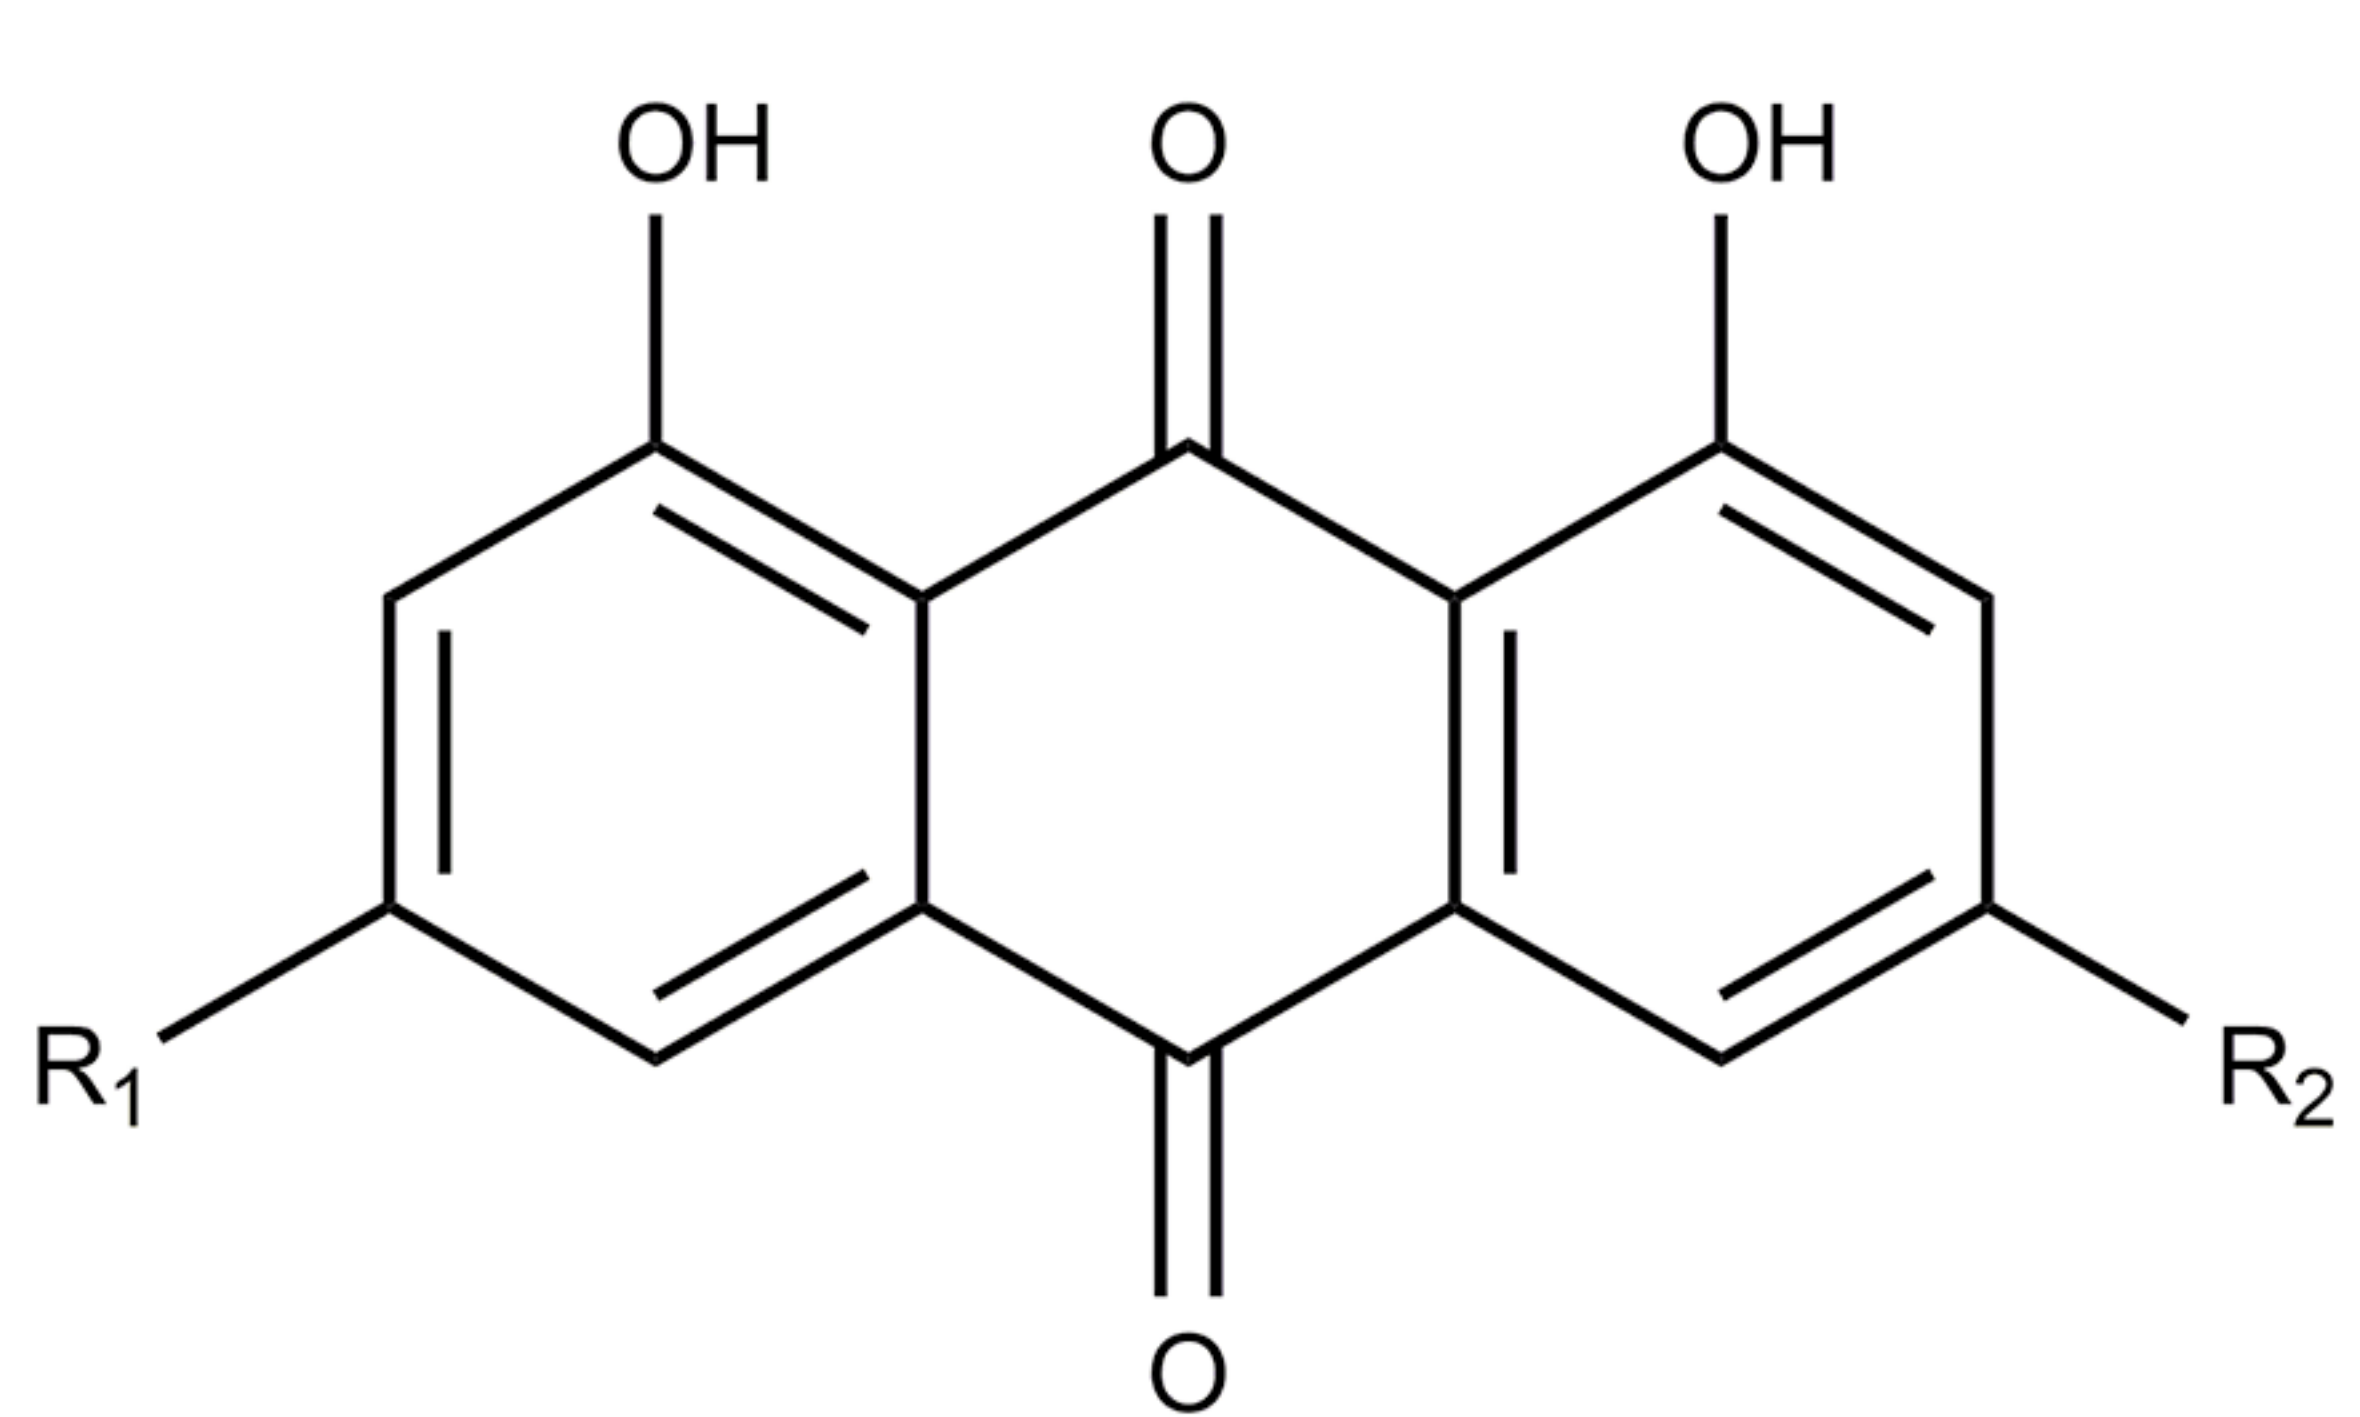

| No. | R1 | R2                   |
|-----|----|----------------------|
| 118 | Me | OMe                  |
| 119 | Me | OH                   |
| 120 | H  | COOH                 |
| 121 | H  | CH <sub>2</sub> OH   |
| 122 | H  | Me                   |
| 123 | H  | CH <sub>2</sub> ORha |

Supplementary Fig. 5. Structures of quinones isolated from the genus *Spatholobus*.

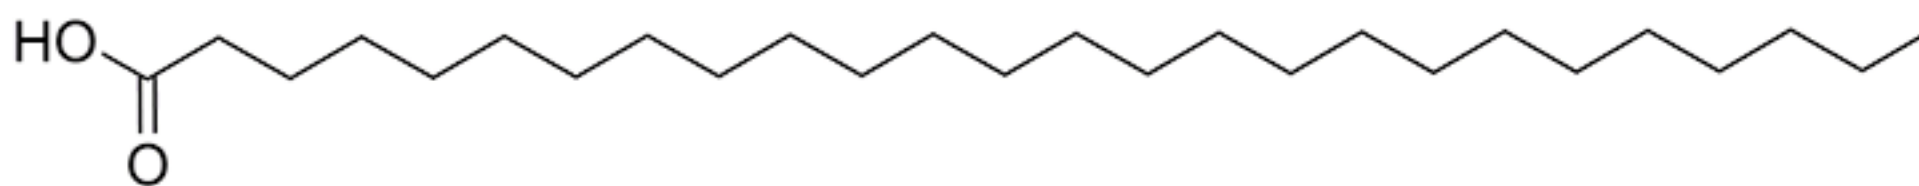

124

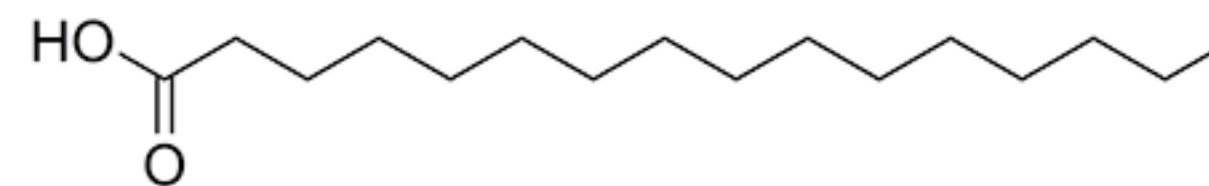

125

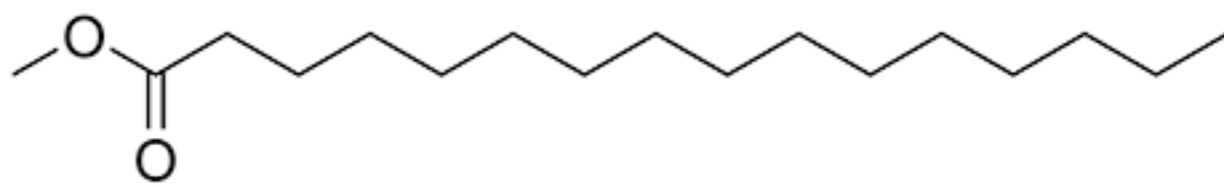

127

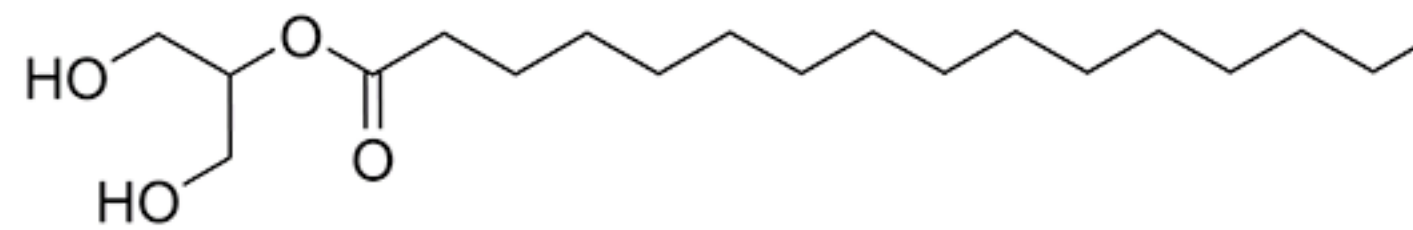

128

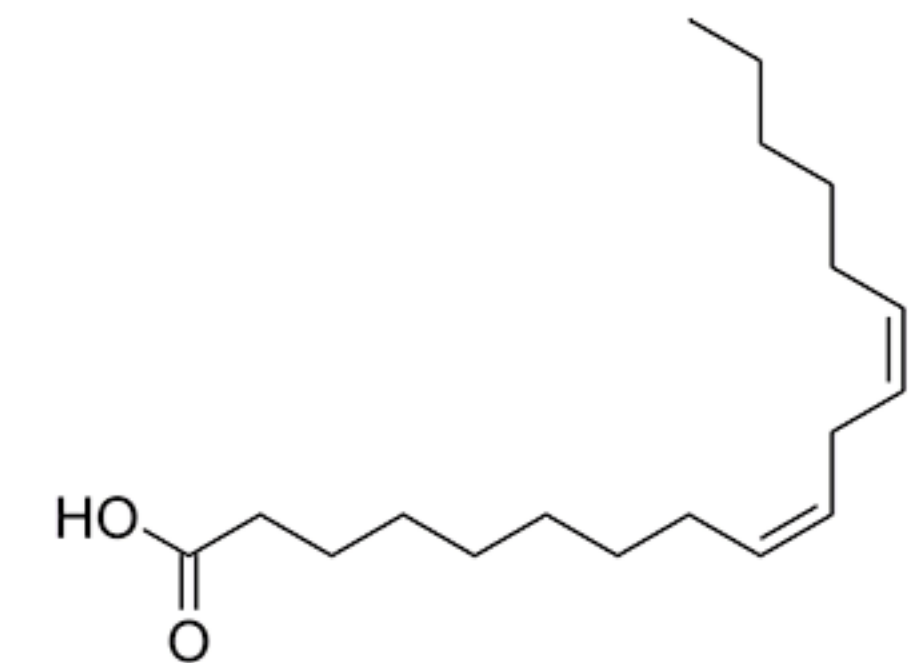

126

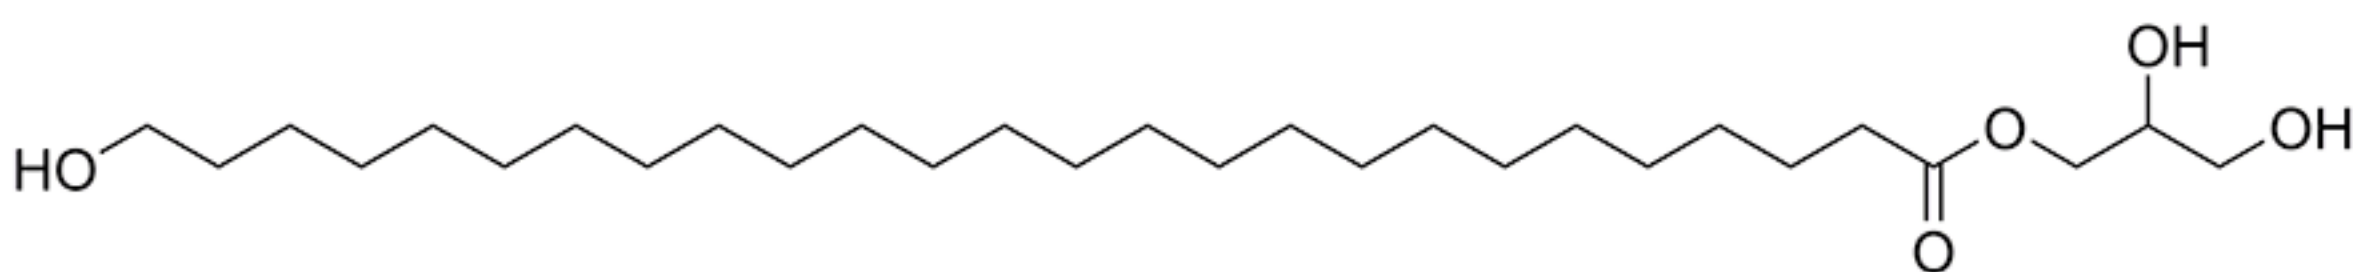

129

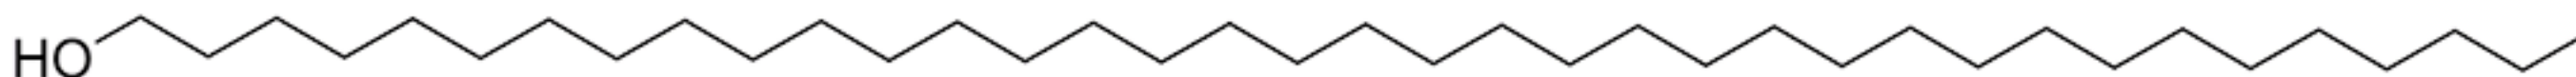

130

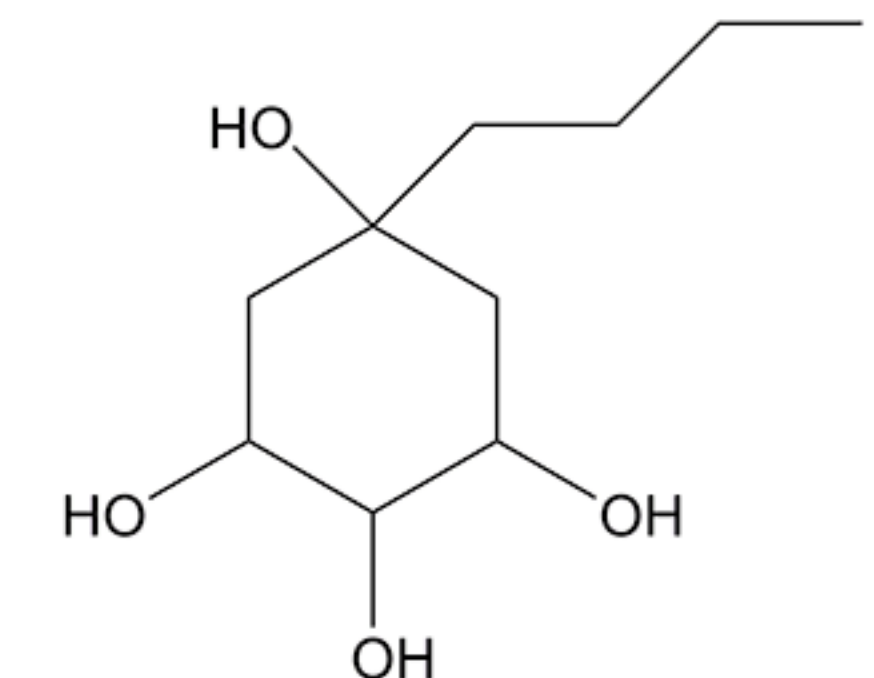

131

Supplementary Fig. 6. Structures of lipids isolated from the genus *Spatholobus*.

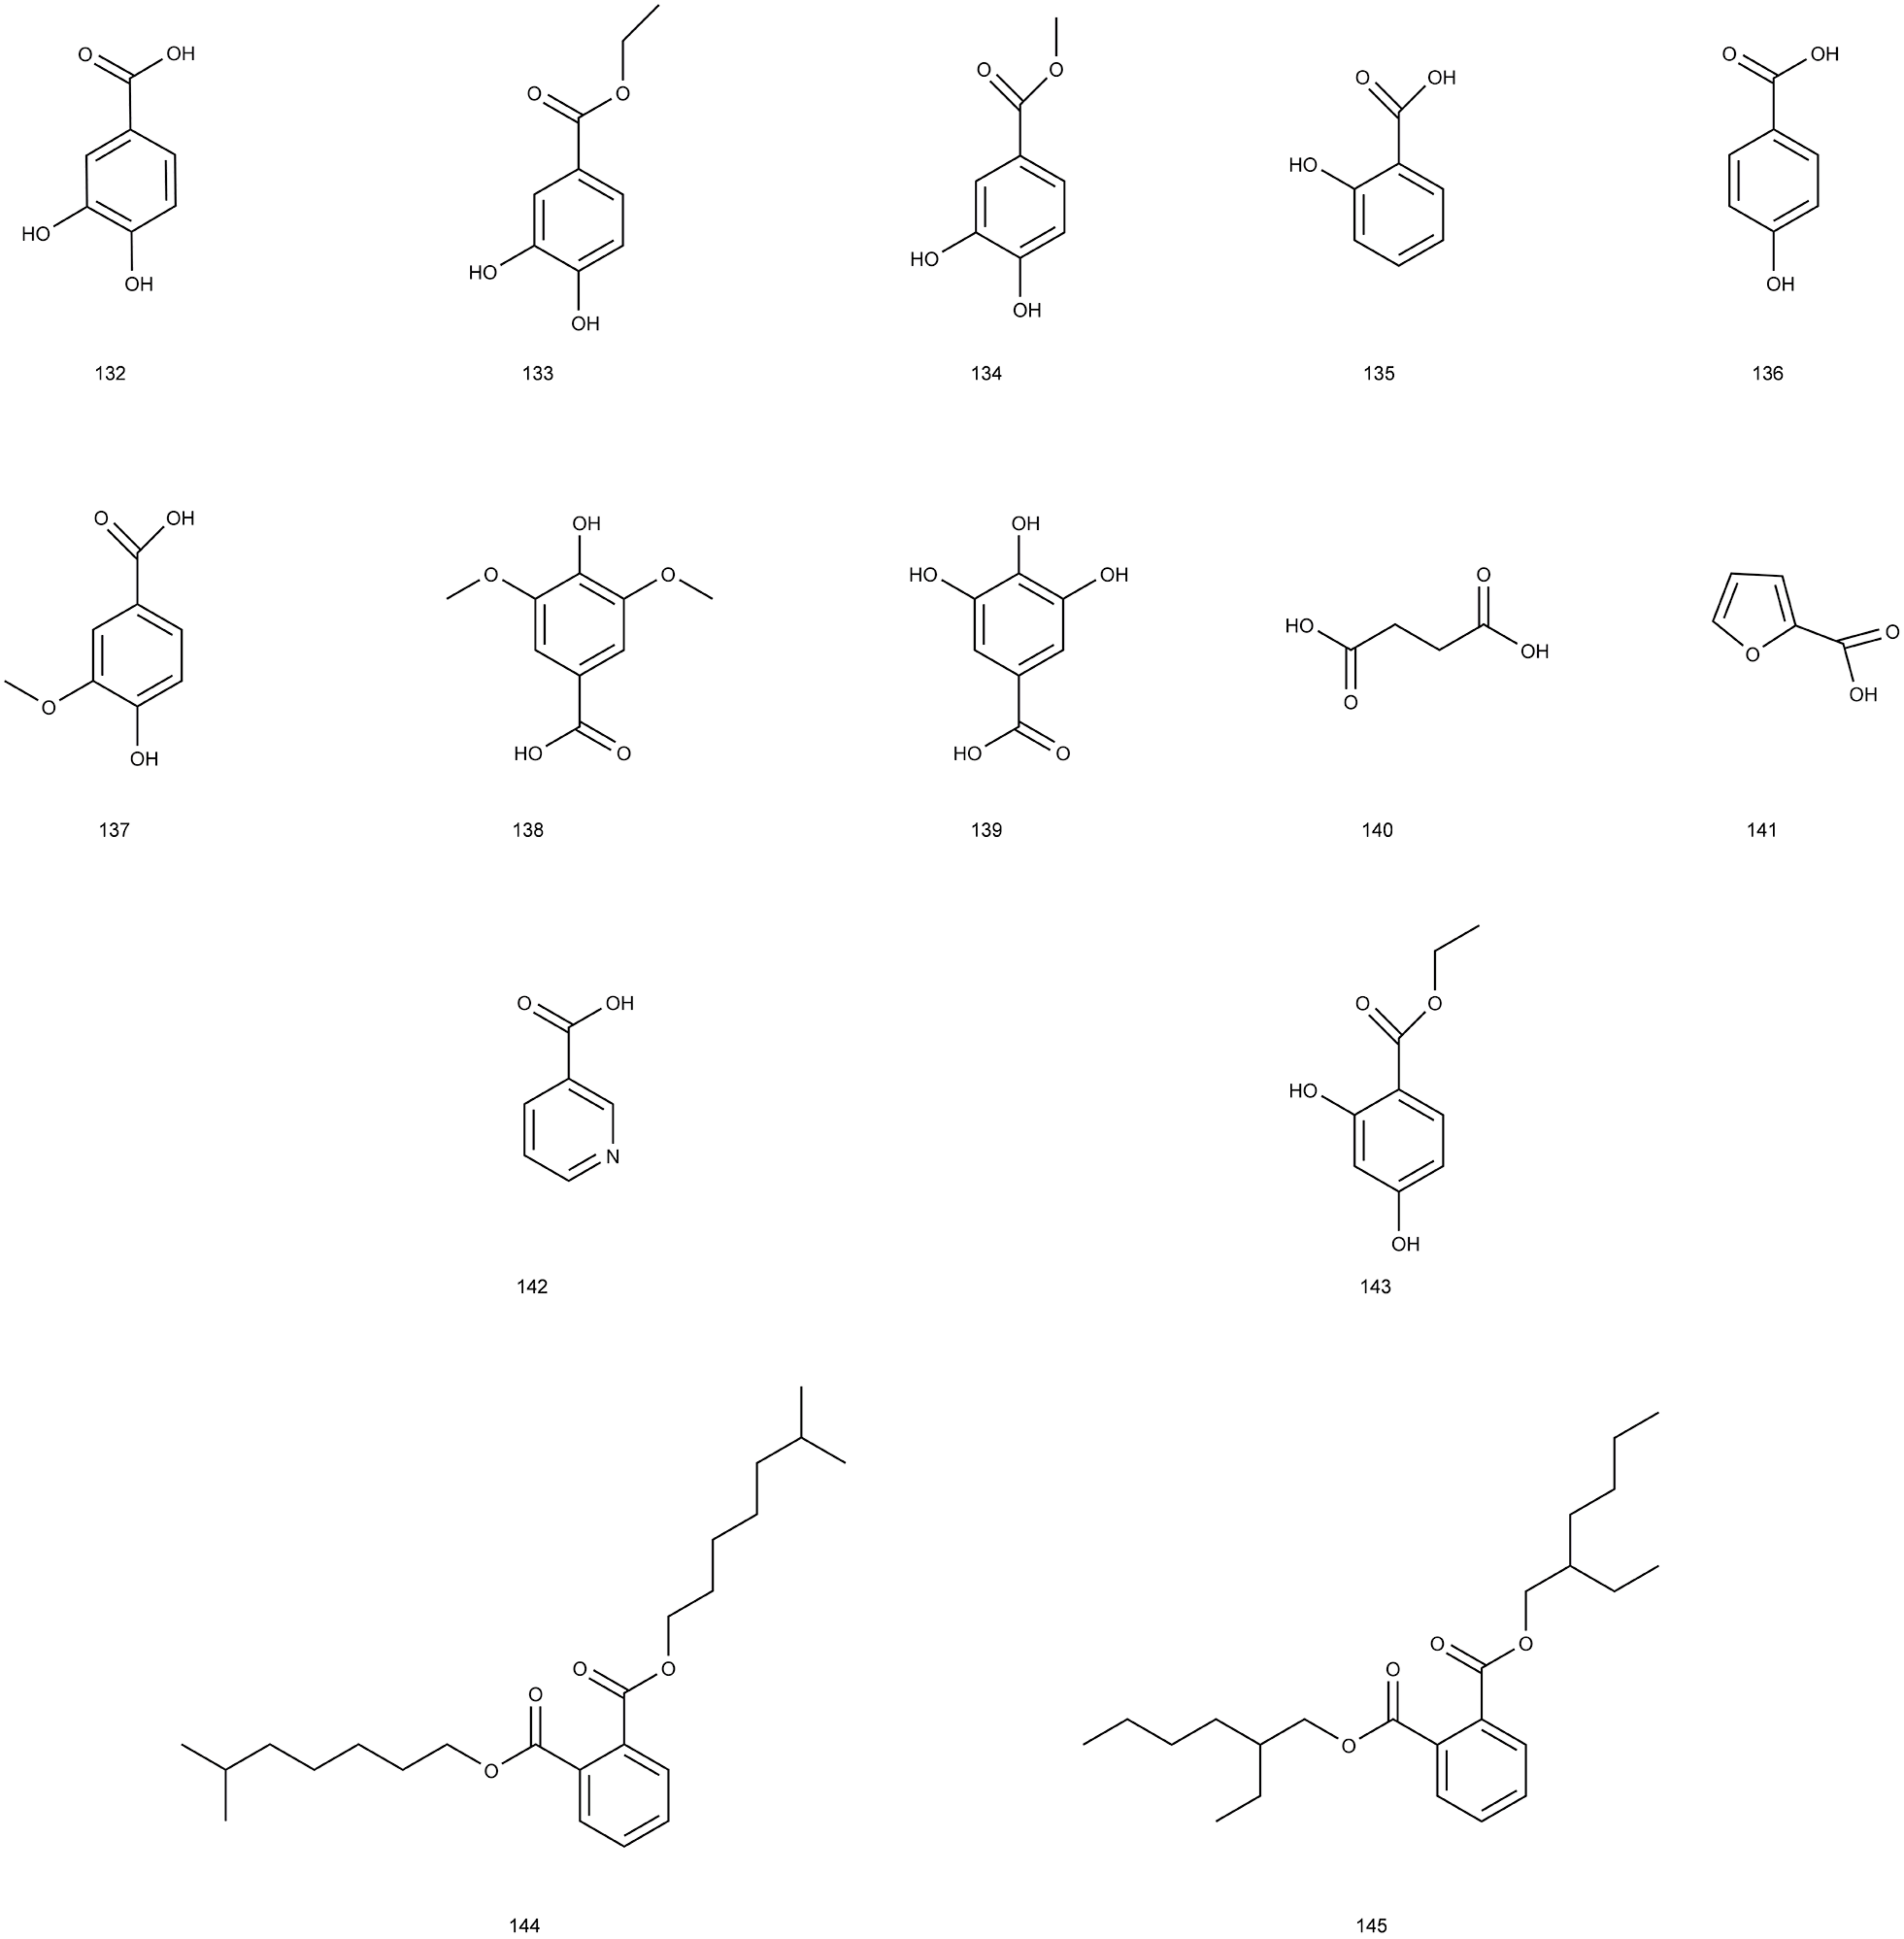

**Supplementary Fig. 7.** Structures of organic acids isolated from the genus *Spatholobus*.



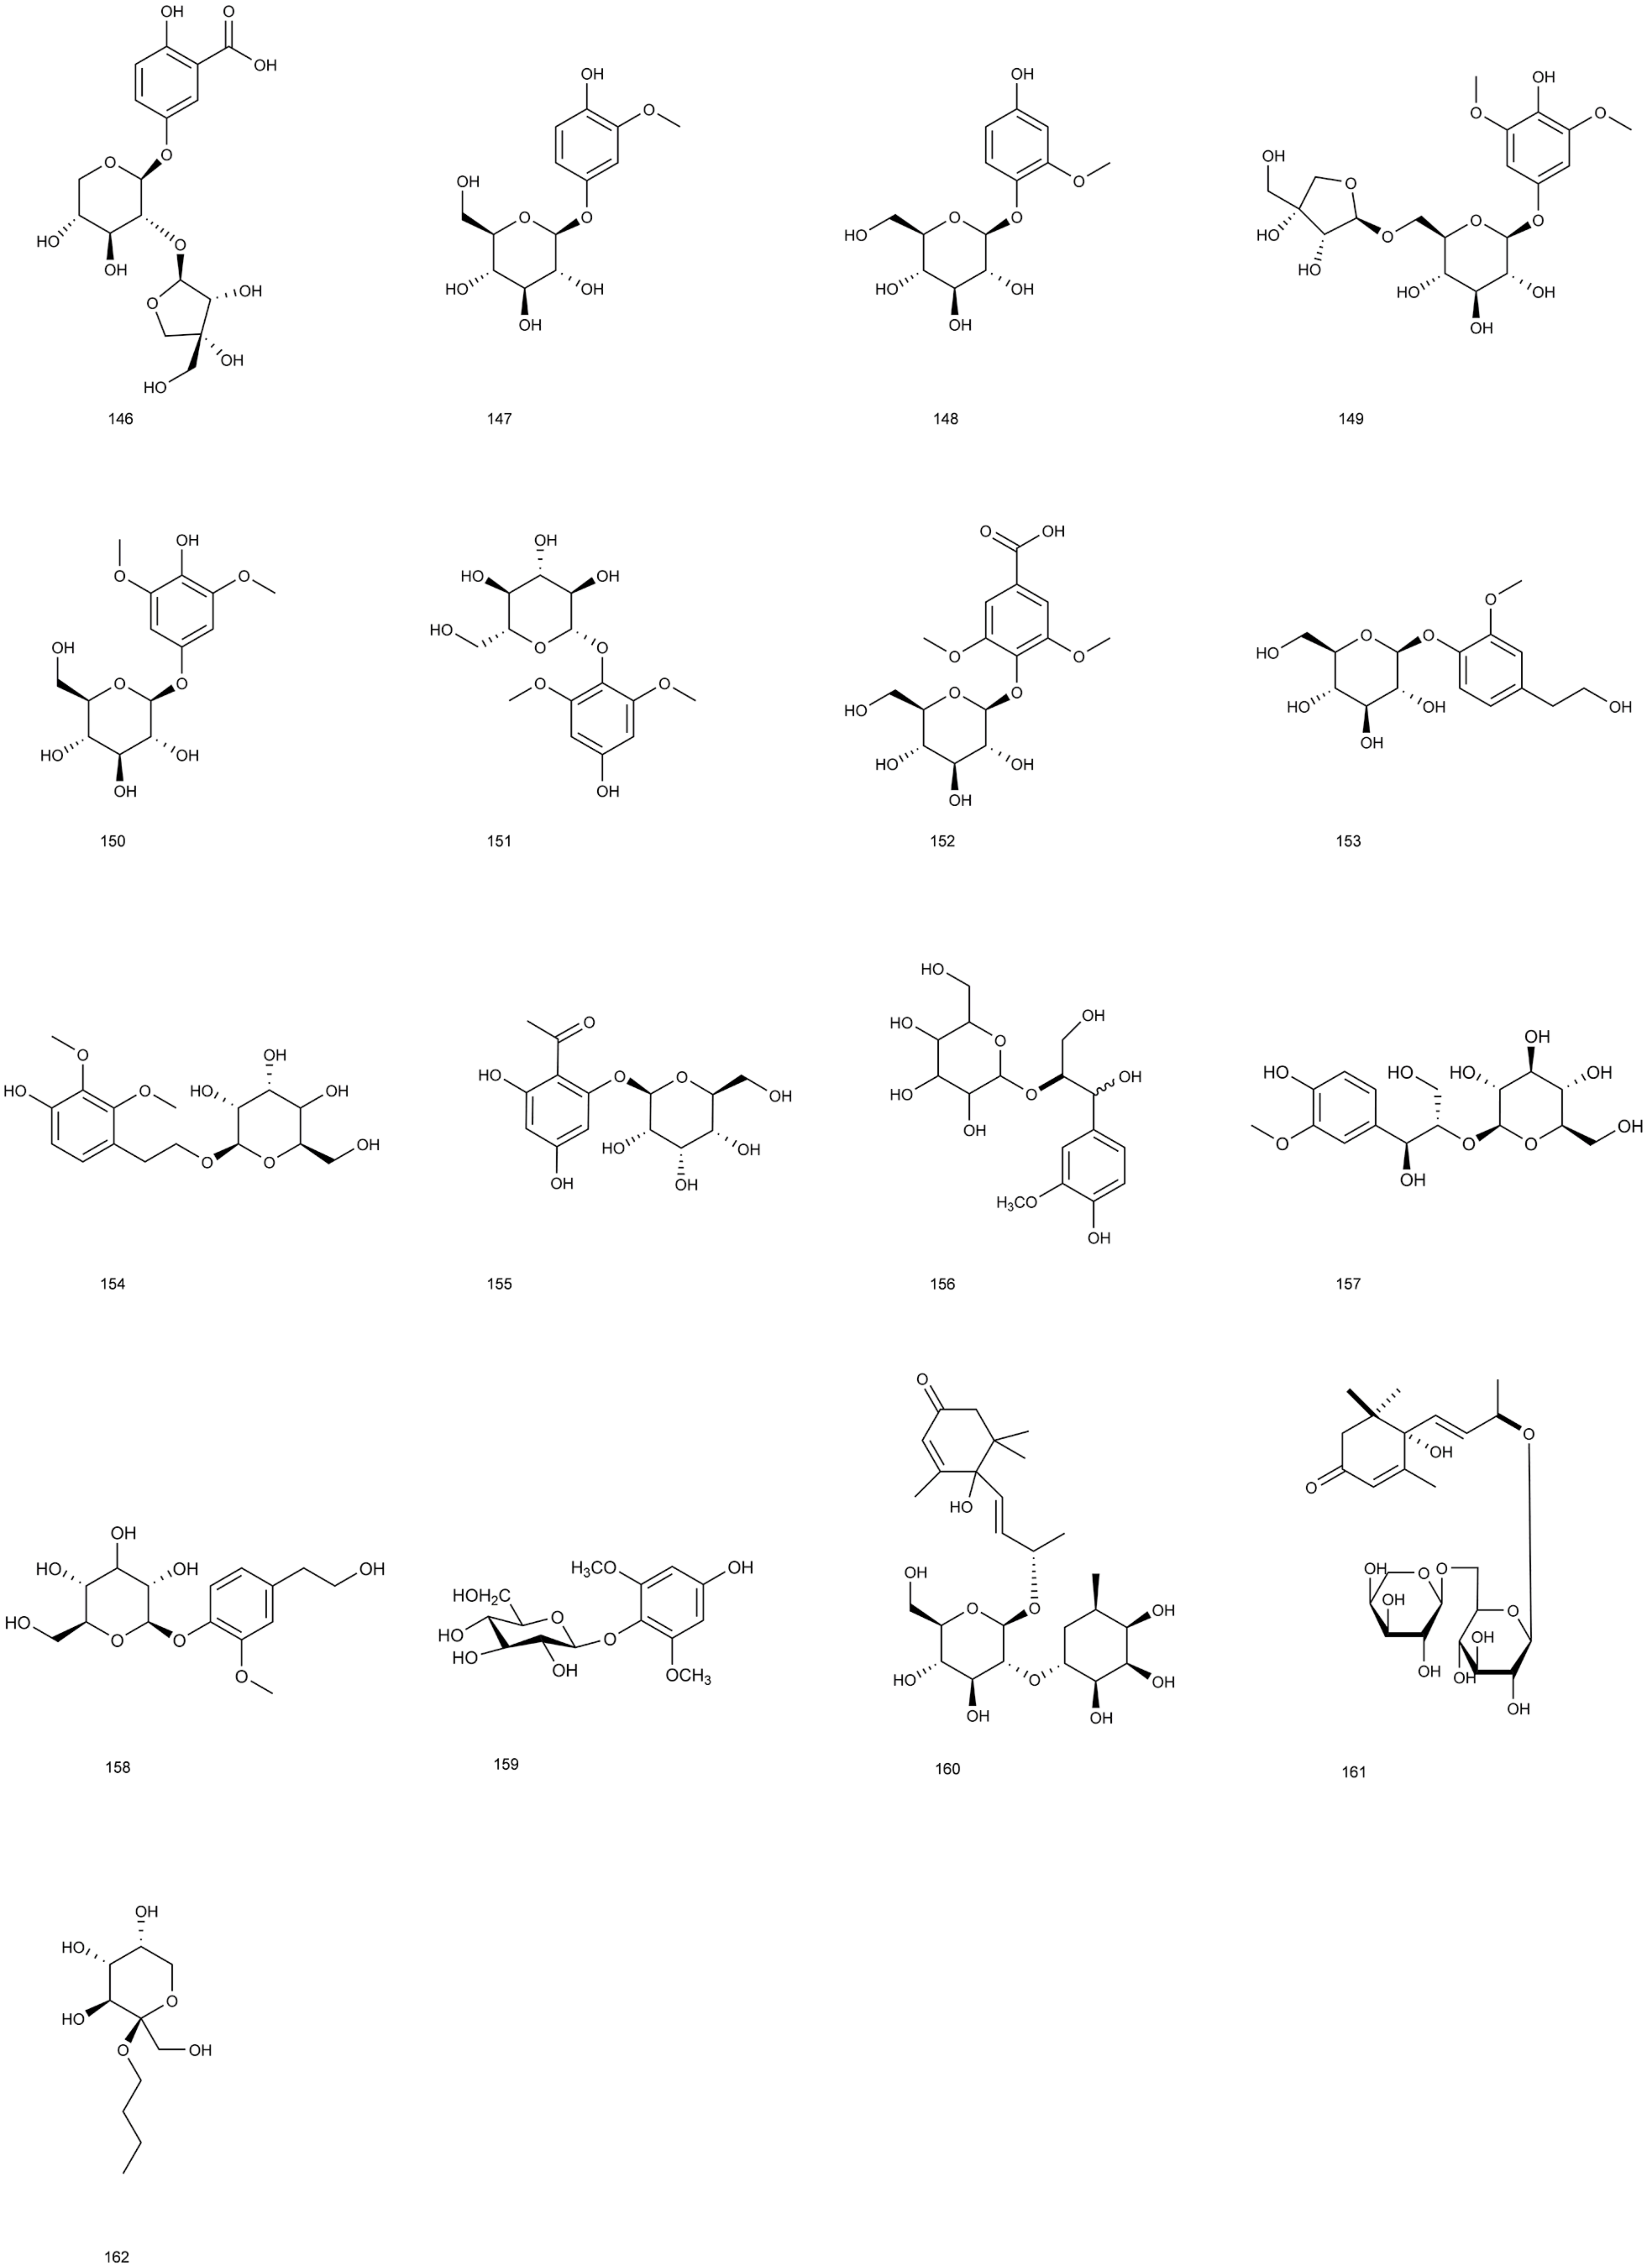

Supplementary Fig. 8. Structures of carbohydrates and glycosides isolated from the genus *Spatholobus*.



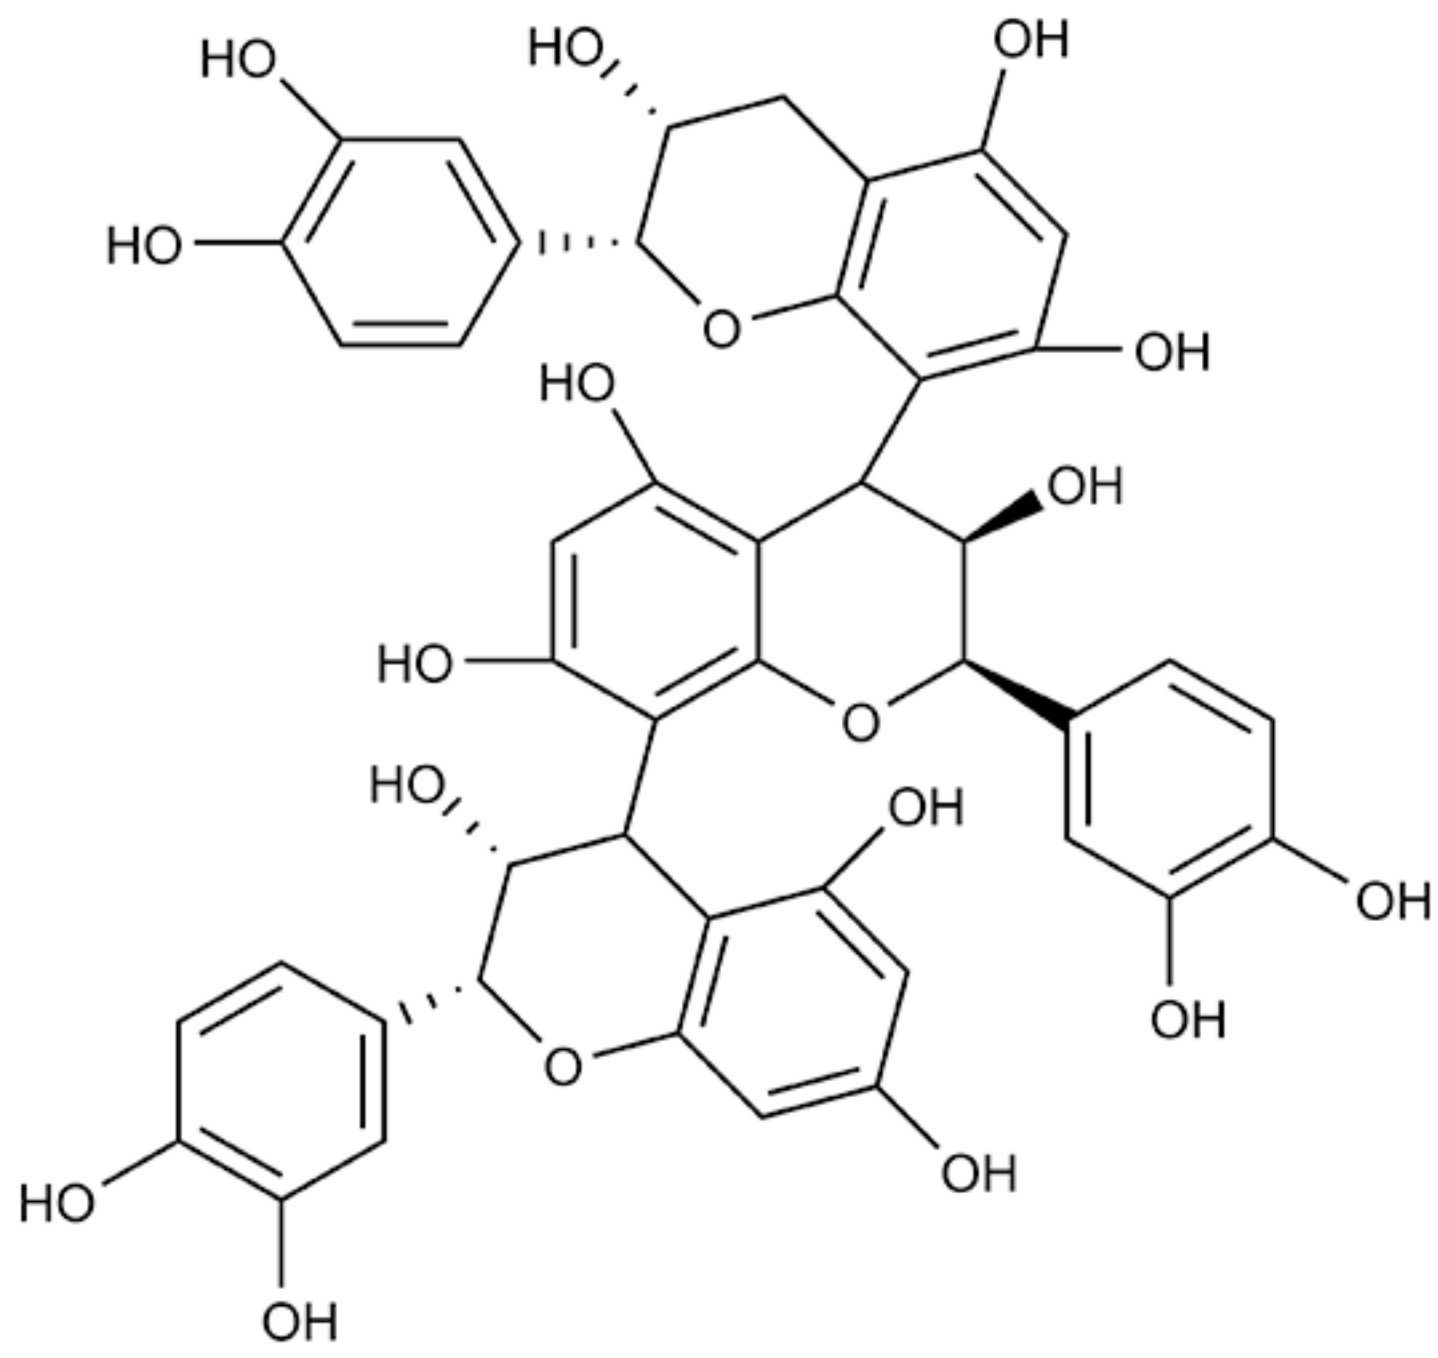

163

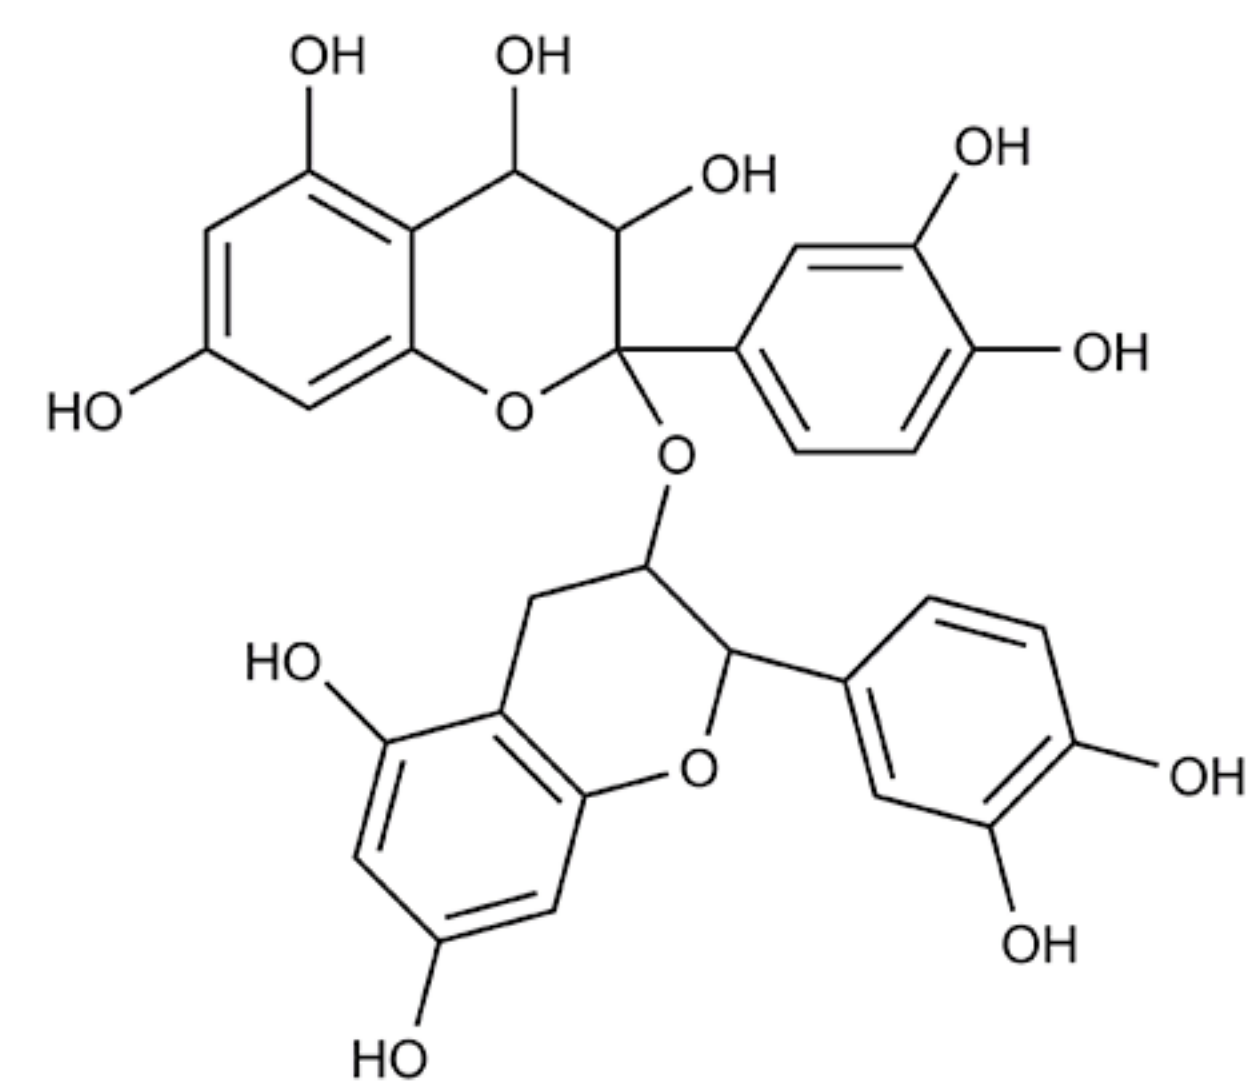

164

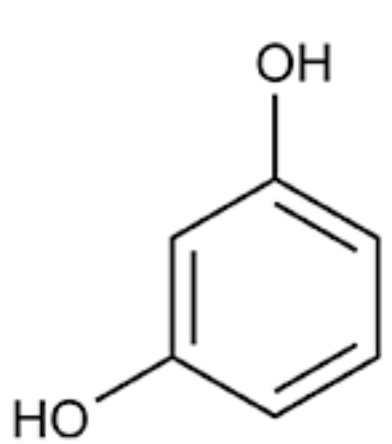

165

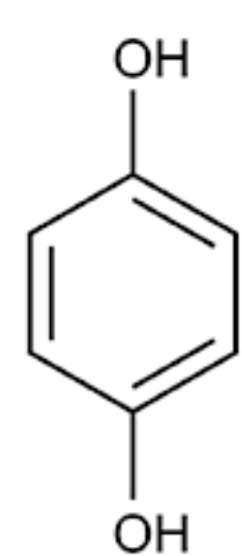

166

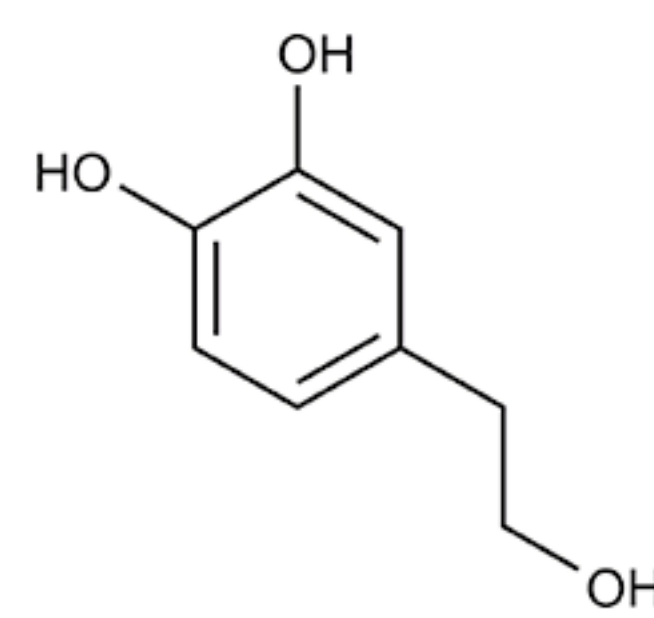

167

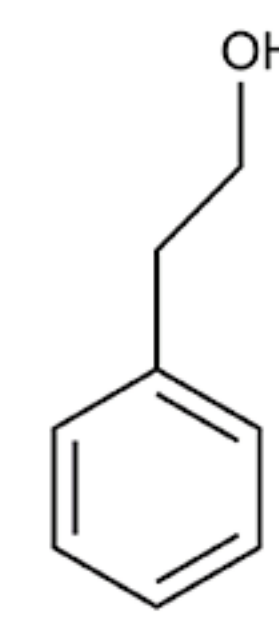

168

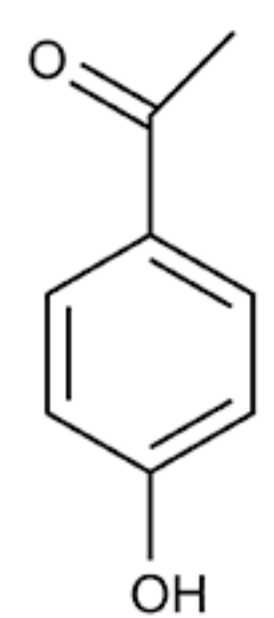

169

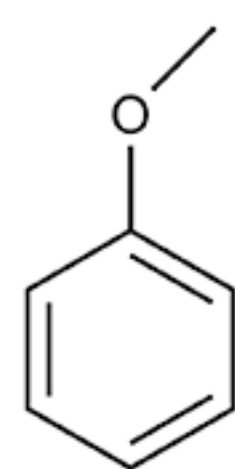

170

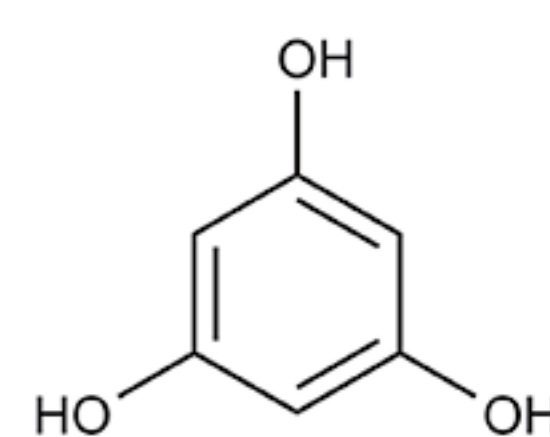

171

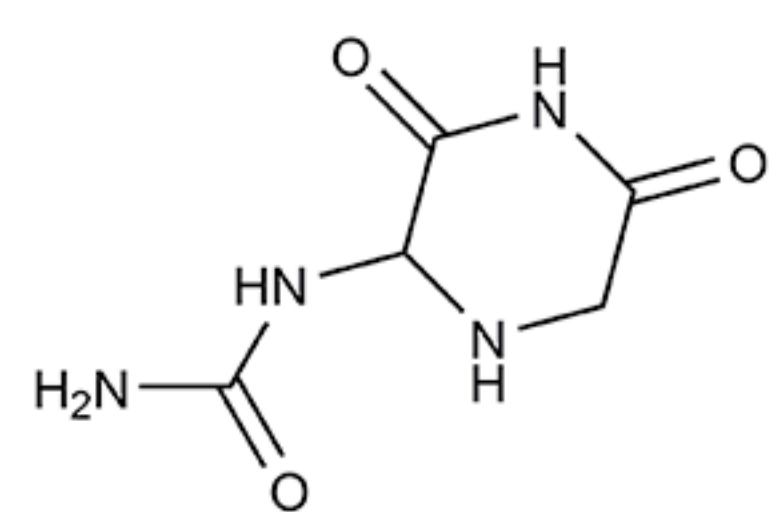

172

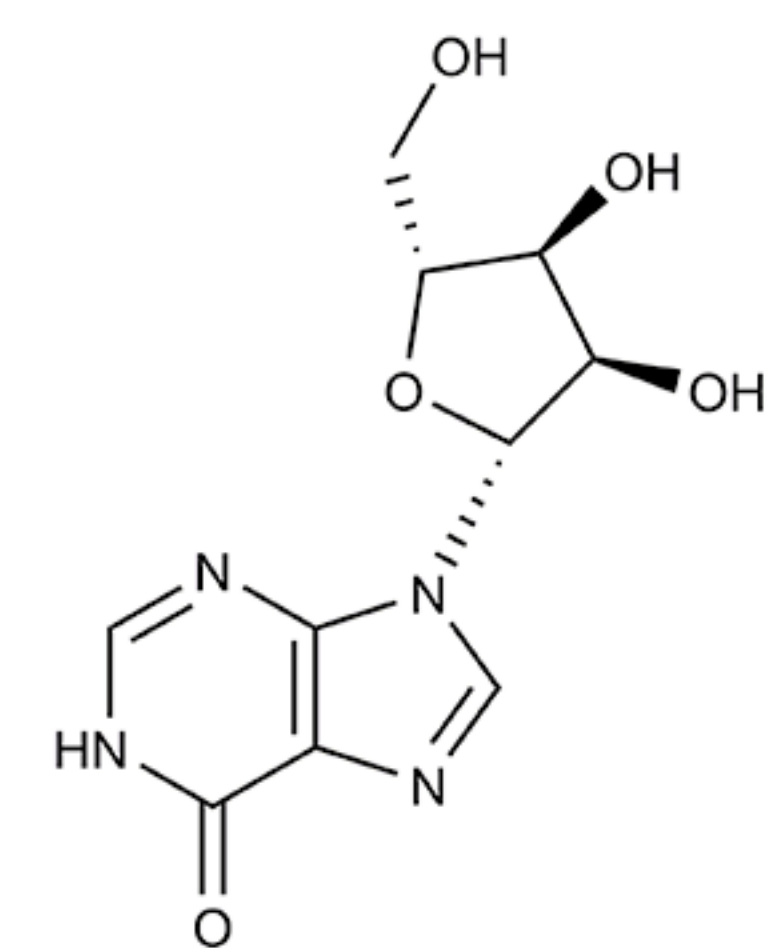

173

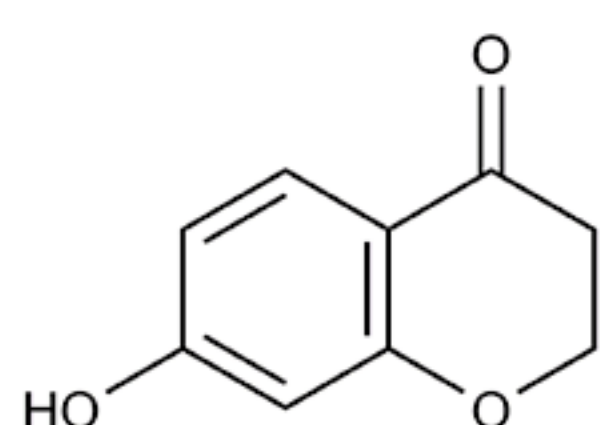

174

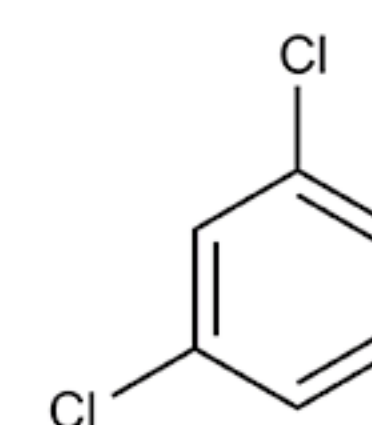

175

Supplementary Fig. 9. Structures of other compounds isolated from the genus *Spatholobus*.
